# Supplementary material
Source: PubMed Central journal article supplement (PMC10516241)
Supplement: NIHMS1931111-supplement-Supplementary_Information.pdf [file NIHMS1931111-supplement-Supplementary_Information.pdf]

## Supplementary Information

# Expanding the Scope of Bacterial CRISPR Activation with PAM-flexible dCas9 Variants

Cholpisit Kiattisewee<sup>+,1</sup>, Ava V. Karanjia<sup>+,1,2</sup>, Mateusz Legut<sup>3,4</sup>, Zharko Daniloski<sup>#,3,4</sup>, Samantha E. Koplik<sup>5</sup>, Joely Nelson<sup>1</sup>, Benjamin P. Kleinstiver<sup>6,7,8</sup>, Neville E. Sanjana<sup>3,4</sup>, James M. Carothers<sup>\*,1,2,5</sup>, Jesse G. Zalatan<sup>\*,1,2,9</sup>

1: Molecular Engineering & Sciences Institute and Center for Synthetic Biology  
University of Washington  
Seattle, WA 98195  
United States

2: Department of Chemical Engineering  
University of Washington  
Seattle, WA 98195  
United States

3: New York Genome Center  
New York, NY 10013  
United States

4: Department of Biology  
New York University  
New York, NY 10013  
United States

5: Department of Bioengineering  
University of Washington  
Seattle, WA 98195  
United States

6: Center for Genomic Medicine  
Massachusetts General Hospital  
Boston, MA 02114  
United States

7: Department of Pathology  
Massachusetts General Hospital  
Boston, MA 02114  
United States

8: Department of Pathology  
Harvard Medical School  
Boston, MA 02115  
United States

9: Department of Chemistry  
University of Washington  
Seattle, WA 98195  
United States

#: current affiliation: Beam Therapeutics  
Cambridge, MA 02142  
United States

†: These authors contributed equally

\*: Corresponding authors

[jcaroth@uw.edu](mailto:jcaroth@uw.edu)

206-221-4902

[zalatan@uw.edu](mailto:zalatan@uw.edu)

206-543-1670

## Table of Contents

|                                                                                                        |    |
|--------------------------------------------------------------------------------------------------------|----|
| <b>Supplementary Figures</b>                                                                           | 4  |
| Figure S1: Mutations contributing to PAM-flexibility of engineered dCas9 variants                      | 4  |
| Figure S2: CRISPRko and CRISPRa in mammalian systems with PAM-flexible dCas9 variants                  | 5  |
| Figure S3: PAM availability and distribution in <i>E. coli</i> and <i>P. putida</i> promoters          | 6  |
| Figure S4: Expression capacity and growth burden associated with dCas9 variants                        | 7  |
| Figure S5: Basal expression of the mRFP reporter gene with different dCas9 variants and PAMs sequences | 9  |
| Figure S6: CRISPRi with PAM-flexible dCas9 variants                                                    | 10 |
| Figure S7: CRISPRa at endogenous promoters with PAM-flexible dCas9 variants                            | 11 |
| <b>Supplementary Tables</b>                                                                            | 13 |
| Supplementary Table S1: <i>E. coli</i> strains.                                                        | 13 |
| Supplementary Table S2: Selected <i>E. coli</i> plasmids.                                              | 13 |
| Supplementary Table S3: scRNA and sgRNA target sites.                                                  | 15 |
| Supplementary Table S4: Predicted compatible PAMs for each dCas9 variants                              | 16 |
| Supplementary Table S5: CRISPRa on endogenous <i>E. coli</i> promoters                                 | 19 |
| <b>Supplementary Methods</b>                                                                           | 20 |
| Evaluating PAM accessibility from CRISPR knockout and CRISPR activation screens in mammalian systems   | 20 |
| PAM compatibility analysis                                                                             | 20 |
| Endogenous promoter and scRNA selection strategy                                                       | 20 |
| <b>DNA sequences</b>                                                                                   | 22 |
| <b>References</b>                                                                                      | 33 |

## Supplementary Figures

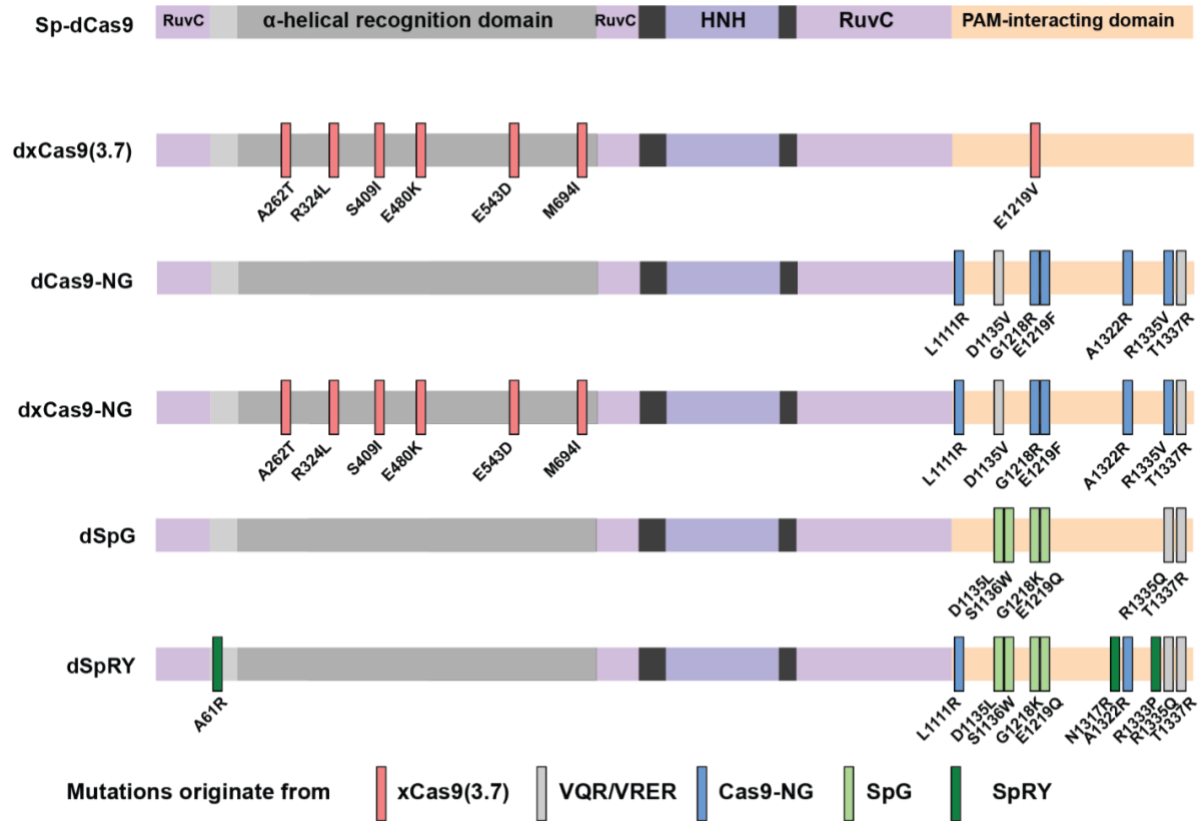

**Figure S1: Mutations contributing to PAM-flexibility of engineered dCas9 variants**

PAM-flexible dCas9 variants contain differing sets of mutations. All variants share the catalytically-inactivating D10A and H840A mutations of dCas9.<sup>1</sup> Mutations of dxCas9(3.7), from phage-assisted continuous evolution (PACE), were mostly at the  $\alpha$ -helical recognition domain.<sup>2</sup> dCas9-NG engineering was guided by the crystal structure with mutations made in the PAM-interacting domain.<sup>3</sup> dxCas9-NG has combined mutations from dxCas9(3.7) and dCas9-NG.<sup>4</sup> dSpG and dSpRY were developed through structure-guided engineering with engineering trajectories monitored using a high-throughput PAM determination assay.<sup>5,6</sup> SpG was engineered using mutations from the VRQR variant as a starting point,<sup>7,8</sup> and SpRY contains mutations from Cas9-NG.<sup>3</sup> dSpRY is an evolved version of dSpG with a preference for NRN and some NYN PAMs (R is purine nucleotides, Y is pyrimidine nucleotides).<sup>6</sup> Mutation colors indicate the origin of each specific mutation. Complete sequences are provided in the DNA sequences section below.

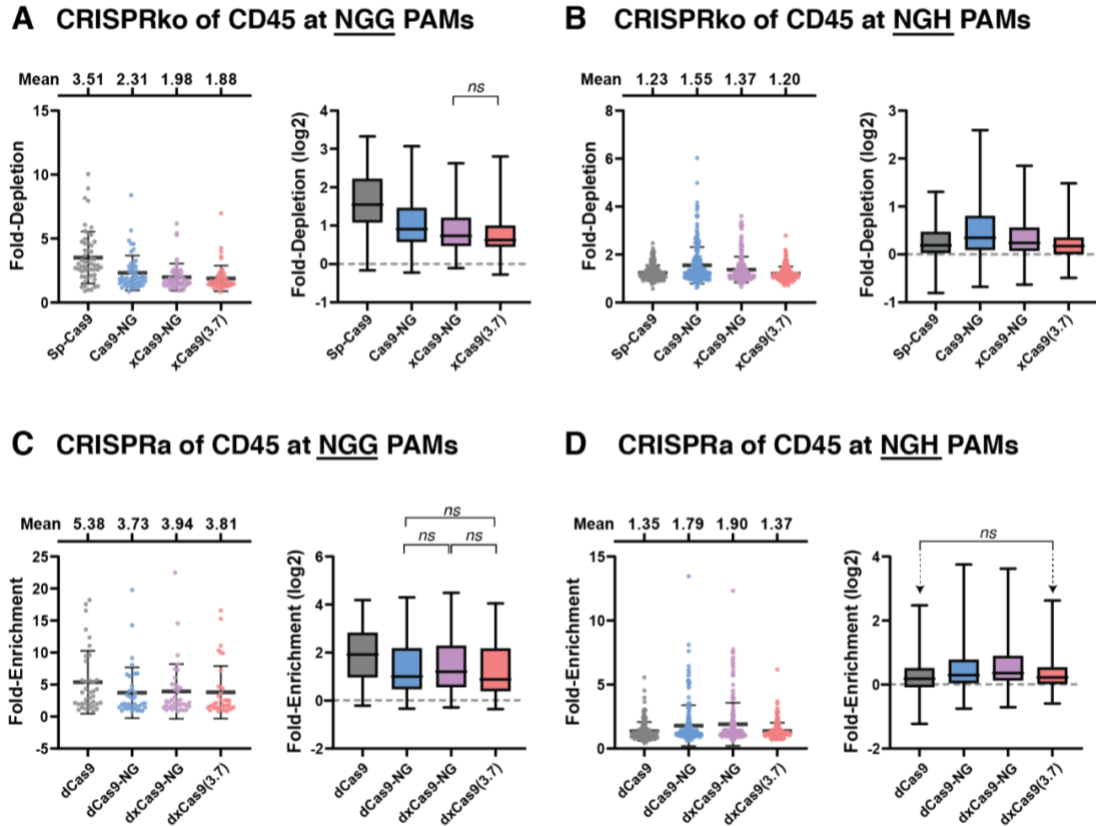

**Figure S2: CRISPRko and CRISPRa in mammalian systems with PAM-flexible dCas9 variants**

Cas9 variants were evaluated for CRISPRko (knockout) and CRISPRa (activation) at different PAMs. sgRNA-Cas9 effector complexes were targeted to the CD45 gene and changes in expression levels were evaluated by FACS-Seq (see Supplemental Methods). xCas9-NG and Cas9-NG exhibit comparable levels of PAM flexibility and both outperform xCas9(3.7). Data were plotted as fold-change scatter plots (left panel) or log2 fold-change box plots (right panel) for (A) CRISPRko at NGG PAMs, (B) CRISPRko at NGH PAMs, (C) CRISPRa at NGG PAMs, and (D) CRISPRa at NGH PAMs. In the scatter plots, bars and whiskers represent mean and standard deviation, respectively. In the box plots, two-tailed unpaired Welch's *t* test for each dCas9 pair were performed. Only non-significant comparisons (*ns*,  $p > 0.05$ ) are indicated; all other differences (between proteins, within modalities) are significant.

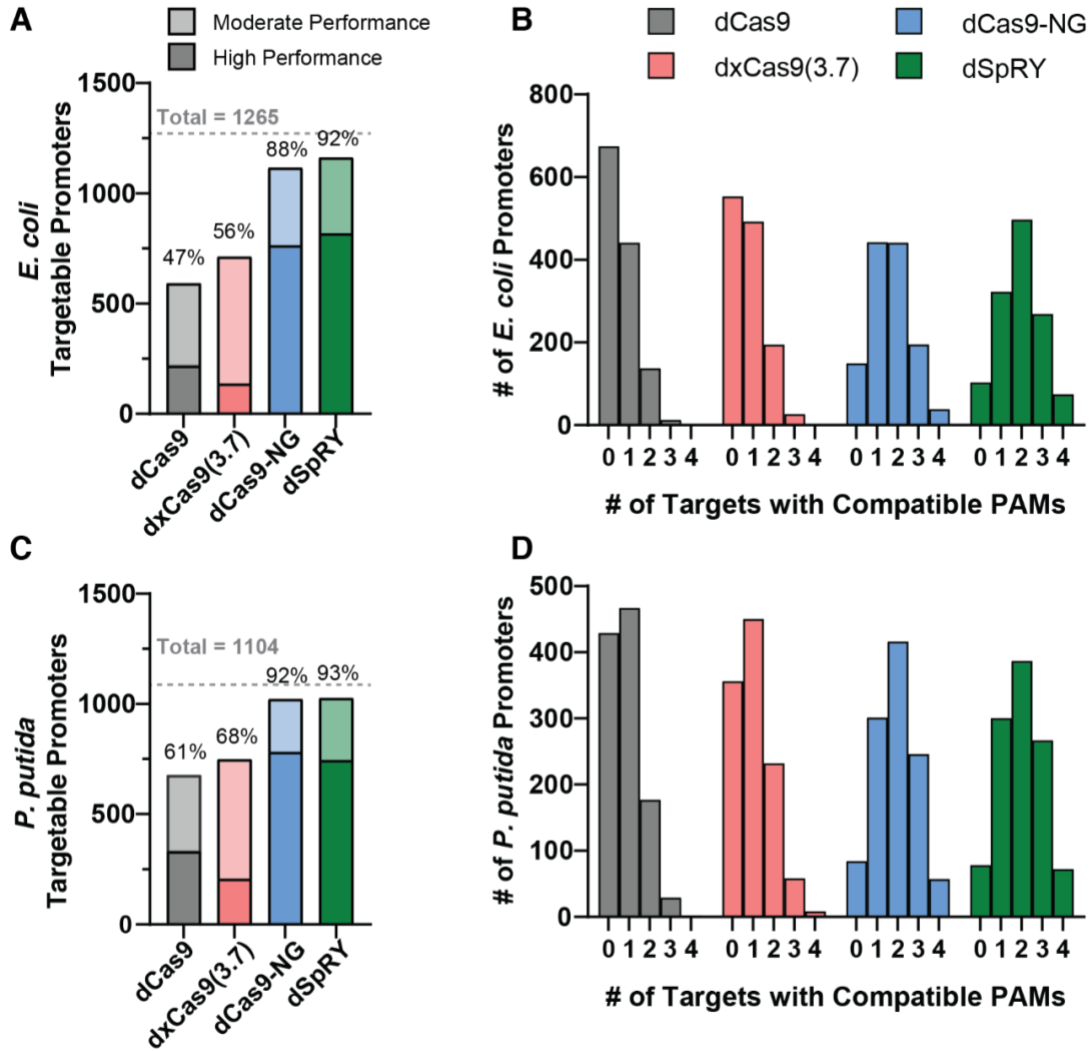

**Figure S3: PAM availability and distribution in *E. coli* and *P. putida* promoters**

Endogenous *E. coli* and *P. putida* promoters were analyzed for predicted targetable sites with different PAM-flexible dCas9 variants (see Methods section for further details). (A) Number of targetable *E. coli* promoters for different PAM-flexible dCas9 variants. 1265 *E. coli* promoters were analyzed for the presence of a compatible PAM at any of the four effective target site positions upstream of the TSS (see Methods). “High performance” PAMs are classified as PAMs with at least 50% efficiency relative to dCas9 at NGG PAMs. “Moderate performance” PAMs are classified as PAMs with 20-50% efficiency. (B) Distribution of promoters with 0 to 4 compatible PAMs with at least moderate performance in *E. coli*. (C) Number of targetable *P. putida* promoters for different PAM-flexible dCas9 variants. 1104 *P. putida* were analyzed with the same strategy. (D) Distribution of promoters with 0 to 4 compatible PAMs with at least moderate performance in *P. putida*. In both *E. coli* and *P. putida*, dxCas9-NG and dSpRY access more endogenous promoters than dCas9 and dxCas9(3.7). As *P. putida* has a higher GC content than *E. coli* and a correspondingly higher fraction of NGN PAMs, there is an almost identical number of targetable promoters for dCas9-NG and dSpRY.

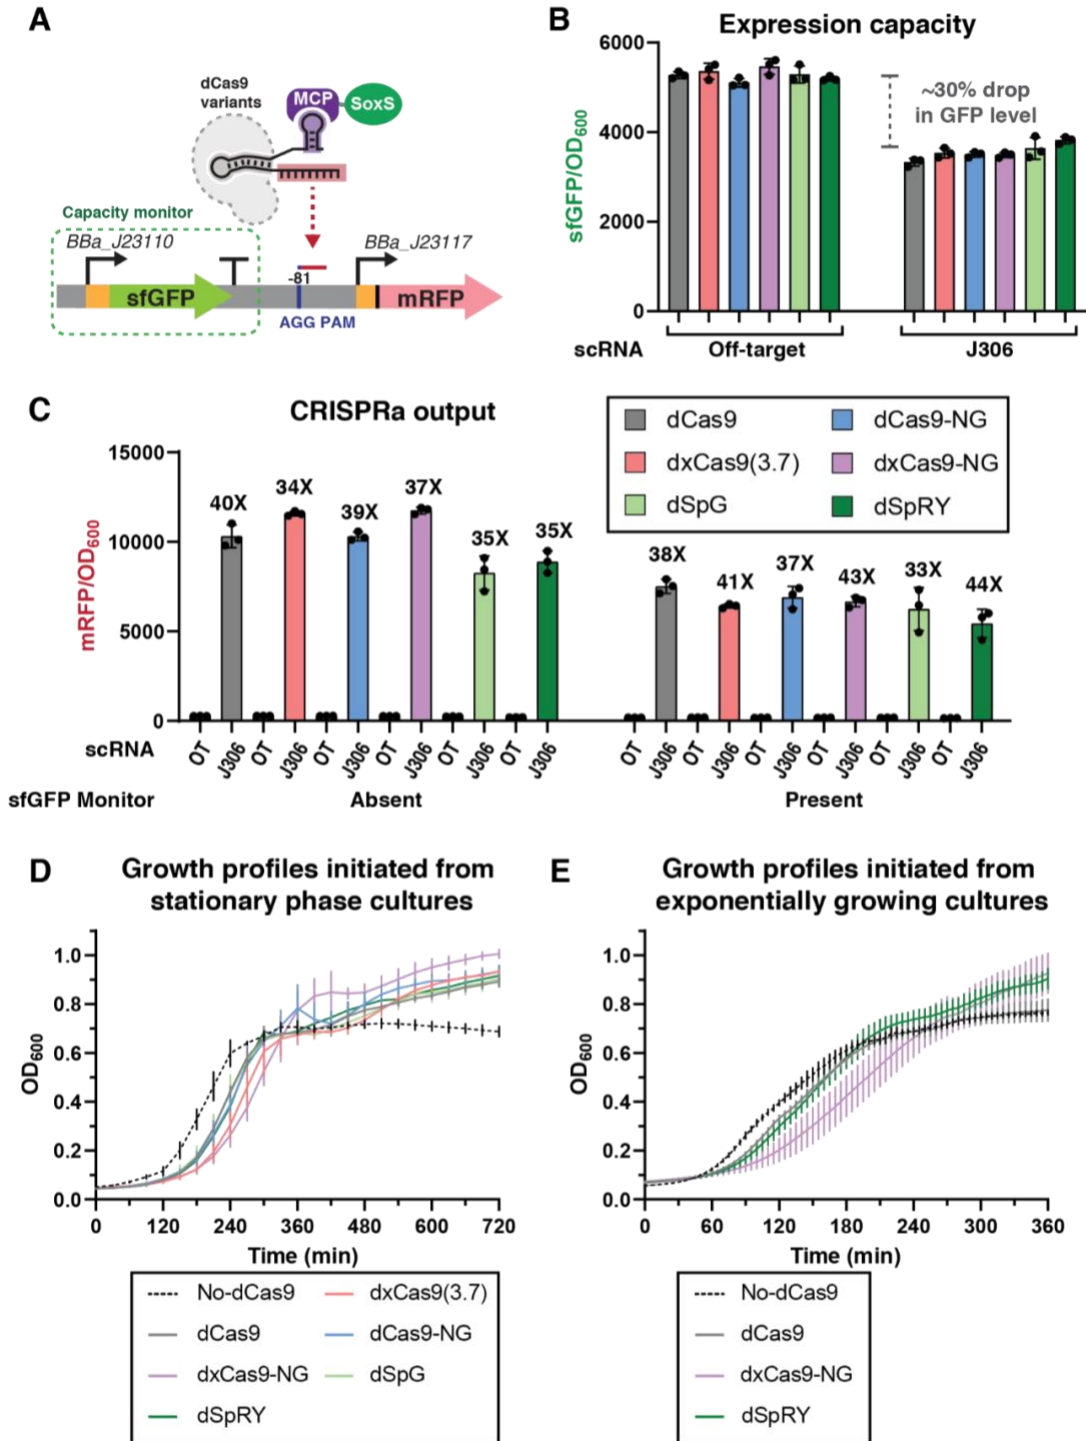

**Figure S4: Expression capacity and growth burden associated with dCas9 variants**

(A) A constitutive, medium-strength promoter (BBa\_J23110) expressing sfGFP acts as a protein expression capacity monitor. (B) CRISPRa upregulation of mRFP (using J306 scRNA) produces a ~30% decrease in the sfGFP expression capacity monitor compared to an off-target scRNA control. Similar effects were observed with all dCas9 variants. (C) The presence of the sfGFP capacity monitor causes a modest decrease in CRISPRa-mediated mRFP expression. The basal expression levels (off-target controls) also decrease, leading to similar mRFP fold-changes

in the presence or absence of the sfGFP capacity monitor. Similar effects were observed with all dCas9 variants. (D&E) Expression of all dCas9 variants caused a modest lag in *E. coli* growth relative to cells that do not express dCas9. In (D), growth profiles were obtained from 1:100 subcultures from overnight, stationary-phase cultures. In (E), growth profiles were obtained by diluting exponentially growing cells back to  $OD_{600} = 0.1$ . This experiment was performed to evaluate if the growth lag from dCas9 expression observed in (D) was caused by slow recovery from stationary phase. We observed a similar growth lag from dCas9 expression in both (D) and (E). A recent paper describes comparable growth experiments with *E. coli* in microbioreactors; these experiments observed similar growth behavior with dCas9, dxCas9, and dSpRY.<sup>9</sup>



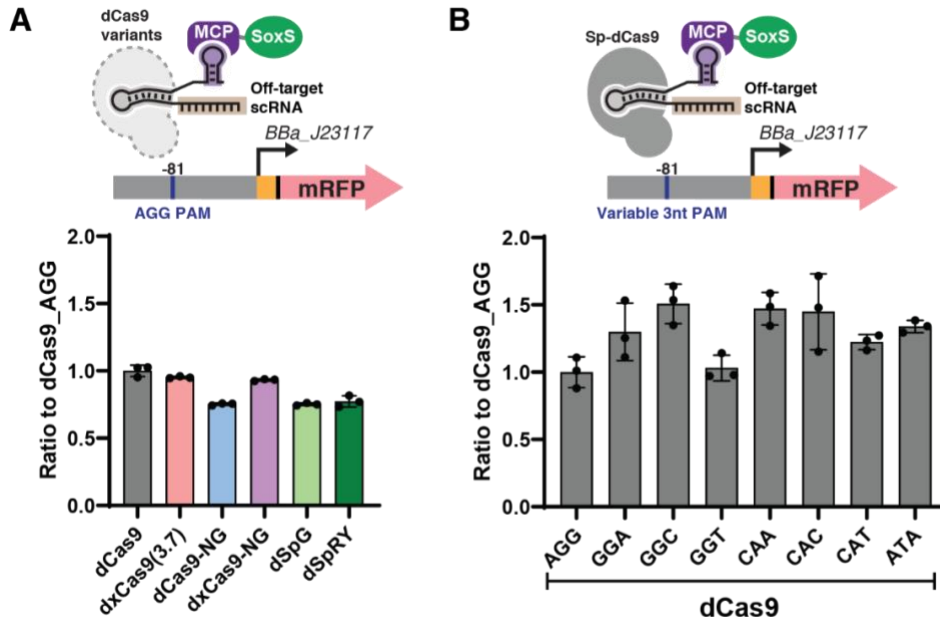

**Figure S5: Basal expression of the mRFP reporter gene with different dCas9 variants and PAMs sequences**

(A) Expression of different dCas9 variants produces less than 2-fold changes in basal reporter expression level. This experiment was performed with AGG PAM reporter and an off-target scRNA (hAAVS1). These off-target expression levels were used as a basal expression for fold-change calculation with each dCas9 variant in Figure 2. (B) Modified mRFP reporter genes with alternative upstream PAM sites produce less than 2-fold changes in basal reporter expression. This experiment was performed with Sp-dCas9 and an off-target scRNA (hAAVS1). Values in panel A and B represent the mean  $\pm$  standard deviation calculated from  $n = 3$ .

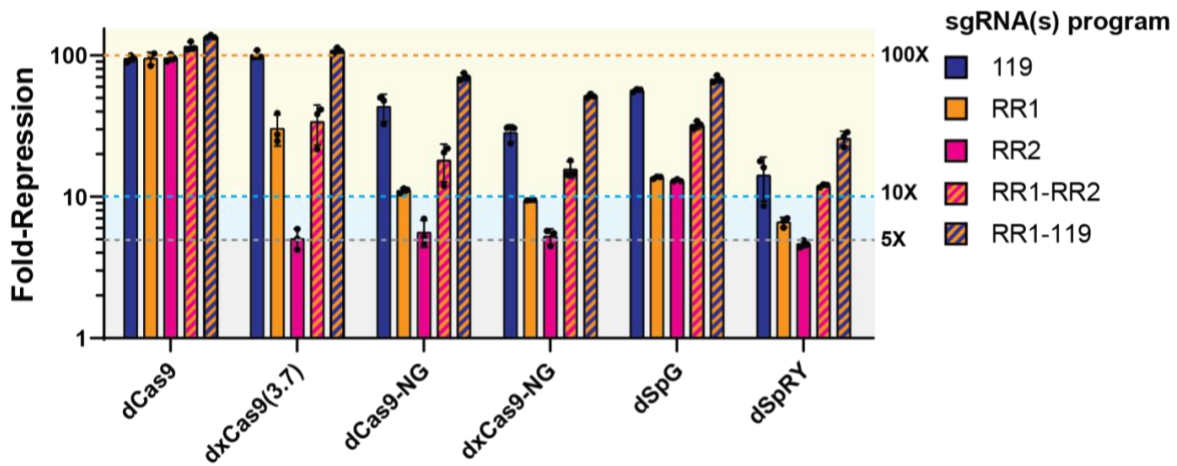

**Figure S6: CRISPRi with PAM-flexible dCas9 variants**

CRISPRi for PAM-flexible dCas9 variants was tested on an mRFP reporter gene with sgRNAs targeting the promoter (119) or coding sequence (RR1 and RR2) with one or two sgRNAs expressed, each targeting sites harboring NGG PAMs. dCas9 exhibited the highest repression efficiency (>90-fold) among all variants. When only a single sgRNA is expressed, the sgRNA targeting the promoter region (119) produces the largest repression effect with all dCas9 variants. The addition of the second sgRNA (RR1-RR2 or RR1-119) led to significant improvement in repression for all variants. Values represent the mean  $\pm$  standard deviation calculated from  $n = 3$ .

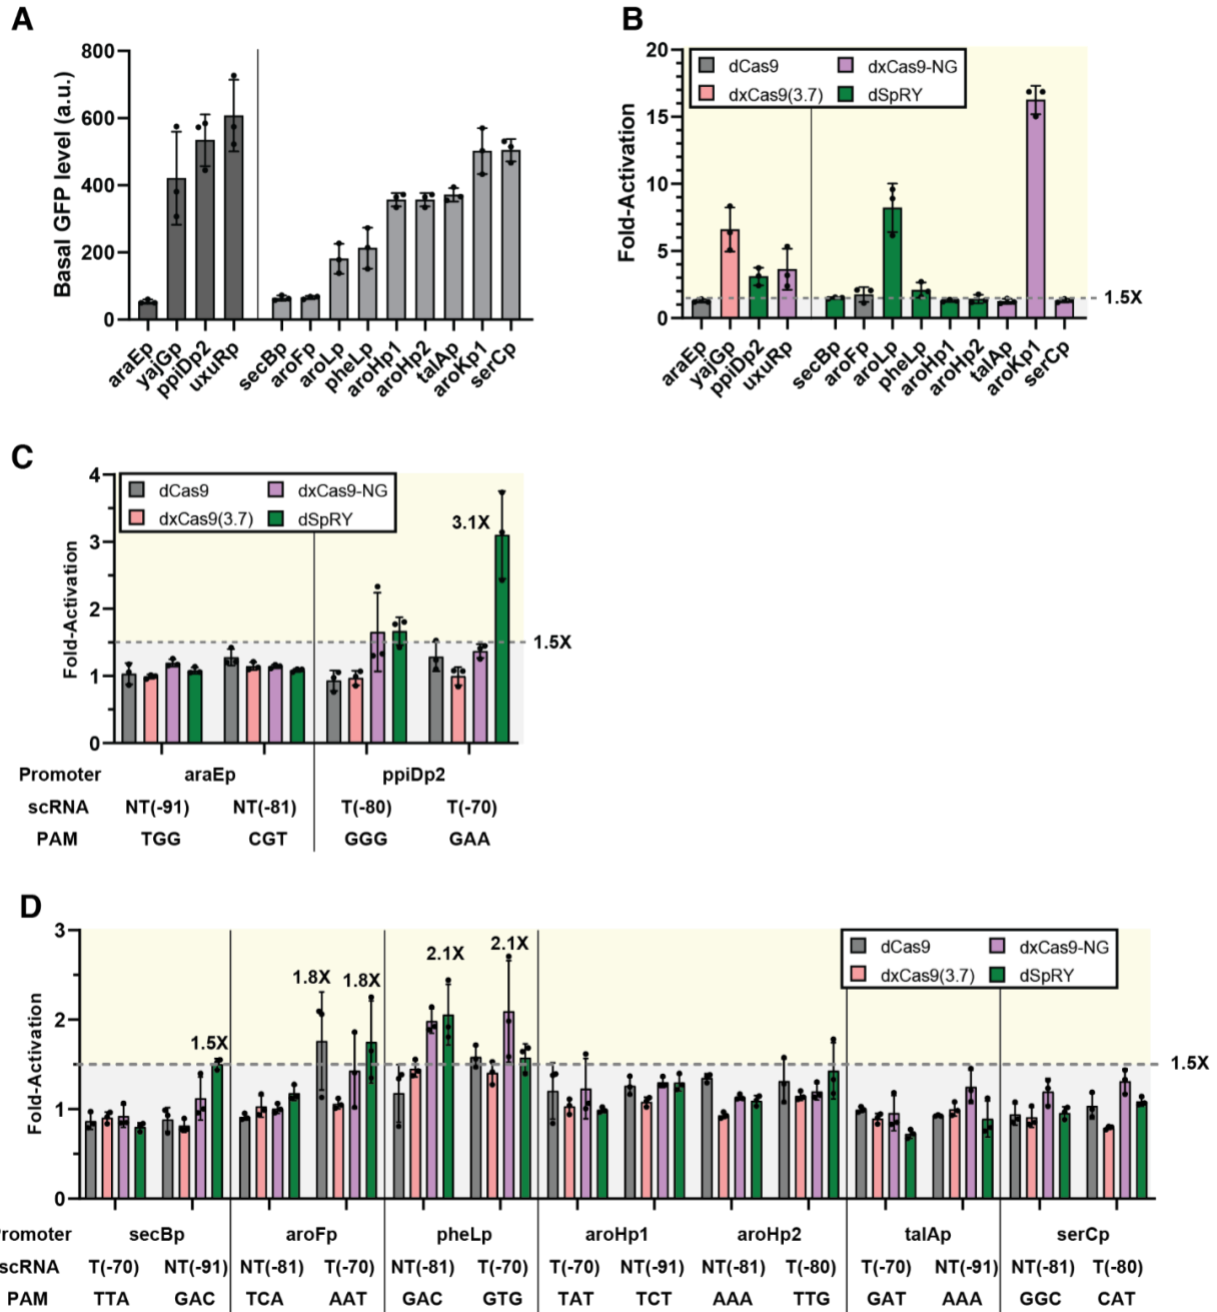

**Figure S7: CRISPRa at endogenous promoters with PAM-flexible dCas9 variants**

(A) Basal expression levels for endogenous promoters (left: promoters previously tested with dxCas9(3.7);<sup>10</sup> right: new promoters examined in this work). Basal expression levels were measured in a strain expressing the parent dCas9 and an off-target scRNA (hAAVS1). (B) Maximum fold-activation for each endogenous promoter. Bar color indicates the dCas9 variant with the highest fold-activation for the corresponding endogenous promoter. 8 out of 13 endogenous promoters can be activated (>1.5-fold) with PAM-flexible dCas9 variants. (C) CRISPRa at endogenous promoters previously tested with dxCas9(3.7) (araEp and ppiDp2) using NGG or non-NGG PAMs. See main text Figure 4B for the other two promoters from this set (yajGp and uxuRp). (D) CRISPRa at endogenous promoters involved in aromatic amino acid

biosynthesis using non-NGG PAMs (secBp, aroFp, pheLp, aroHp1, aroHp2, talAp, and serCp). See main text Figure 4C for the other two promoters from the aromatic amino acid biosynthesis set (aroLp and aroKp1). Data were collected by flow cytometry and fold-activation was calculated compared to the strain expressing the corresponding dCas9 variant and an off-target hAAVS1 scRNA. Values in panels A-D represent the mean  $\pm$  standard deviation calculated from  $n = 3$ .

## Supplementary Tables

**Supplementary Table S1: *E. coli* strains.**

| Strain | Description                                                                    | Genotype                              |
|--------|--------------------------------------------------------------------------------|---------------------------------------|
| MG1655 | Wildtype <i>E. coli</i> strain                                                 | F- $\lambda$ - ilvG- rfb-50 rph-1     |
| CD38   | Integrated BBa_J23119-mRFP used for CRISPRi (adapted from JF01 <sup>11</sup> ) | MG1655 <i>rbsAR</i> ::BBa_J23119-mRFP |

**Supplementary Table S2: Selected *E. coli* plasmids.**

| Plasmid          | Marker | Origin | Promoter                                      | Gene                                      | Terminator                              | Reference     |
|------------------|--------|--------|-----------------------------------------------|-------------------------------------------|-----------------------------------------|---------------|
| pJF043           | CmR    | p15A   | None                                          | None                                      | None                                    | This work     |
| pCD442           | CmR    | p15A   | 1) Sp.pCas9<br>2) BBa_J23107                  | 1) dCas9<br>2) MCP-SoxS                   | 1) BBa_B0015<br>2) BBa_B1002            | <sup>10</sup> |
| pCD564           | CmR    | p15A   | 1) Sp.pCas9<br>2) BBa_J23107                  | 1) dxCas9(3.7)<br>2) MCP-SoxS             | 1) BBa_B0015<br>2) BBa_B1002            | <sup>10</sup> |
| pCK668           | CmR    | p15A   | 1) Sp.pCas9<br>2) BBa_J23107                  | 1) dCas9-NG<br>2) MCP-SoxS                | 1) BBa_B0015<br>2) BBa_B1002            | This work     |
| pCK669           | CmR    | p15A   | 1) Sp.pCas9<br>2) BBa_J23107                  | 1) dxCas9-NG<br>2) MCP-SoxS               | 1) BBa_B0015<br>2) BBa_B1002            | This work     |
| pCK340           | CmR    | p15A   | 1) Sp.pCas9<br>2) BBa_J23107                  | 1) dSpG<br>2) MCP-SoxS                    | 1) BBa_B0015<br>2) BBa_B1002            | This work     |
| pCK341           | CmR    | p15A   | 1) Sp.pCas9<br>2) BBa_J23107                  | 1) dSpRY<br>2) MCP-SoxS                   | 1) BBa_B0015<br>2) BBa_B1002            | This work     |
| pCK085.<br>scRNA | CmR    | p15A   | 1) Sp.pCas9<br>2) BBa_J23107<br>3) BBa_J23119 | 1) dCas9<br>2) MCP-SoxS<br>3) scRNA       | 1) BBa_B0015<br>2) BBa_B1002<br>3) TrnB | <sup>12</sup> |
| pCK281.<br>scRNA | CmR    | p15A   | 1) Sp.pCas9<br>2) BBa_J23107<br>3) BBa_J23119 | 1) dxCas9(3.7)<br>2) MCP-SoxS<br>3) scRNA | 1) BBa_B0015<br>2) BBa_B1002<br>3) TrnB | This work     |
| pCK670.<br>scRNA | CmR    | p15A   | 1) Sp.pCas9<br>2) BBa_J23107<br>3) BBa_J23119 | 1) dCas9-NG<br>2) MCP-SoxS<br>3) scRNA    | 1) BBa_B0015<br>2) BBa_B1002<br>3) TrnB | This work     |
| pCK671.<br>scRNA | CmR    | p15A   | 1) Sp.pCas9<br>2) BBa_J23107<br>3) BBa_J23119 | 1) dxCas9-NG<br>2) MCP-SoxS<br>3) scRNA   | 1) BBa_B0015<br>2) BBa_B1002<br>3) TrnB | This work     |
| pCK363.<br>scRNA | CmR    | p15A   | 1) Sp.pCas9<br>2) BBa_J23107<br>3) BBa_J23119 | 1) dSpG<br>2) MCP-SoxS<br>3) scRNA        | 1) BBa_B0015<br>2) BBa_B1002<br>3) TrnB | This work     |
| pCK364.<br>scRNA | CmR    | p15A   | 1) Sp.pCas9<br>2) BBa_J23107<br>3) BBa_J23119 | 1) dSpRY<br>2) MCP-SoxS<br>3) scRNA       | 1) BBa_B0015<br>2) BBa_B1002<br>3) TrnB | This work     |

|                            |      |          |                                   |                     |                              |                       |
|----------------------------|------|----------|-----------------------------------|---------------------|------------------------------|-----------------------|
| pJF143.<br>J3              | AmpR | pSC101** | J3-BBa_J23117                     | mRFP                | BBa_B0015                    | <sup>10</sup>         |
| pCK760                     | AmpR | pSC101** | 1) BBa_J23110<br>2) J3-BBa_J23117 | 1) sfGFP<br>2) mRFP | 1) BBa_B0015<br>2) BBa_B0015 | This work             |
| pCK284.<br>NNN             | AmpR | pSC101** | J3(NNN-PAM)-<br>BBa_J23117        | mRFP                | BBa_B0015                    | This work             |
| pCD443.<br>scRNA           | AmpR | ColE1    | BBa_J23119                        | scRNA               | TrnB                         | This work             |
| pCK411.<br>scRNA/<br>sgRNA | AmpR | ColE1    | BBa_J23119                        | scRNA/sgRNA         | BBa_K268040<br>5             | This work             |
| pCK590.<br>XXX             | KmR  | pSC101   | Endogenous<br>(strand +)          | GFPmut2             |                              | Same as <sup>13</sup> |
| pCK591.<br>XXX             | KmR  | pSC101   | Endogenous<br>(strand -)          | GFPmut2             |                              | Same as <sup>13</sup> |

**Supplementary Table S3: scRNA and sgRNA target sites.**

| sc/sgRNA   | DNA sequence         | Target strand <sup>a</sup> | Distance to TSS <sup>b</sup> | PAM |
|------------|----------------------|----------------------------|------------------------------|-----|
| J306       | TTGTGTCCAGAACGCTCCGT | NT                         | -81                          | AGG |
| hAAVS1     | GGGGCCACTAGGGACAGGAT | Off-target                 | NA                           | -   |
| RR1        | AACTTTCAGTTTAGCGGTCT | NT                         | 151 <sup>c</sup>             | GGG |
| RR2        | TGGAACCGTACTGGAAGTGC | NT                         | 215 <sup>c</sup>             | GGG |
| 119        | AATTCAGATCTATTATACCT | NT                         | -15                          | AGG |
| yajGp_Y1   | TTGACGAAATAATCGCCCCT | NT                         | -81                          | GGT |
| yajGp_Y2   | CATCAGTGTTCCTTTTACCA | T                          | -79                          | GGG |
| uxuRp_U1   | TGATTGACCAGTAAGTCTGT | NT                         | -81                          | AGG |
| uxuRp_U2   | GATTACCCTACAGACTTACT | T                          | -70                          | GGT |
| ppiDp2_D1  | ACTAAGCGTTGTCCCCAGTG | T                          | -80                          | GGG |
| ppiDp2_D2  | GTCCCCAGTGGGGATGTGAC | T                          | -70                          | GAA |
| araEp_E1   | TGCGACATGTCGTTATGTGA | NT                         | -91                          | TGG |
| araEp_E2   | ATTAAATTGCTGCGACATGT | NT                         | -81                          | CGT |
| pheLp_X06  | GCGATACACTCAATATAAAG | NT                         | -81                          | GAC |
| pheLp_X07  | AGAGTAGTCCTTTATATTGA | T                          | -70                          | GTG |
| secBp_X07  | CACCACGGTCCCCAGATTT  | T                          | -70                          | TTA |
| secBp_X08  | AATCTGGGGAACCGTGGTGC | NT                         | -91                          | GAC |
| serCp_X06  | ACCGTTGAGGGCAAAAATGT | NT                         | -81                          | GGC |
| serCp_X09  | CTTTTGTGTGATGCAAGCCA | T                          | -80                          | CAT |
| talAp_X07  | GGTAATAATCCTATAACACT | T                          | -70                          | GAT |
| talAp_X08  | GTGTTATAGGATTATTACCA | NT                         | -91                          | AAA |
| aroFp_X06  | CAGGCAATTTAGTCGCGCTT | NT                         | -81                          | TCA |
| aroFp_X07  | AAGGGTTGAAAGCGGACTA  | T                          | -70                          | AAT |
| aroLp_X07  | TGGTGGCTGGAAGTGCAACG | T                          | -70                          | TAG |
| aroLp_X08  | GTTGCACTTCCAGCCACCAC | NT                         | -91                          | TTC |
| aroHp1_X07 | ATTGCCACCAAGATCCTCGA | T                          | -70                          | TAT |
| aroHp1_X08 | CGAGGATCTTGGTGGCAATC | NT                         | -91                          | TCT |
| aroHp2_X06 | GTGGTTAGCATGATAACAAA | NT                         | -81                          | AAA |
| aroHp2_X09 | TAGTGCATTAGCTTATTTTT | T                          | -80                          | TTG |
| aroKp1_X07 | GAGTAAACAGCCGTAAAAGC | T                          | -70                          | GGT |
| aroKp1_X08 | CTTTTACGGCTGTTTACTCA | NT                         | -91                          | CTG |

<sup>a</sup> Template strand (T) or non-template strand (NT).

<sup>b</sup> Distance from the 3' end of the guide site (PAM proximal) to the TSS. For synthetic promoters (BBa\_J23117 or BBa\_J23119, <http://parts.igem.org>), the TSS is immediately downstream.

<sup>c</sup> For RR1 and RR2 sgRNAs, the positive number refers to the distance downstream of the TSS.

**Supplementary Table S4: Predicted compatible PAMs for each dCas9 variants**

| <b>PAM</b> | <b>Sp-Cas9</b> | <b>xCas9(3.7)</b> | <b>Cas9-NG</b> | <b>SpG</b> | <b>SpRY</b> |
|------------|----------------|-------------------|----------------|------------|-------------|
| <b>AAA</b> | 0.18%          | 2.75%             | 19.51%         | N.A.       | 27.97%      |
| <b>AAC</b> | 0.06%          | 1.52%             | 17.62%         | N.A.       | 69.73%      |
| <b>AAG</b> | 46.32%         | 19.04%            | 43.10%         | N.A.       | 28.35%      |
| <b>AAT</b> | 0.25%          | 3.80%             | 28.04%         | N.A.       | 6.58%       |
| <b>ACA</b> | 0.61%          | 0.23%             | 5.03%          | N.A.       | 19.84%      |
| <b>ACC</b> | -0.50%         | -0.15%            | 2.18%          | N.A.       | N.A.        |
| <b>ACG</b> | 17.85%         | 7.43%             | 12.10%         | N.A.       | N.A.        |
| <b>ACT</b> | -0.45%         | 0.47%             | 7.07%          | N.A.       | N.A.        |
| <b>AGA</b> | 27.95%         | 29.33%            | 60.81%         | 65.89%     | 58.50%      |
| <b>AGC</b> | 7.82%          | 16.70%            | 52.14%         | 75.97%     | 56.19%      |
| <b>AGG</b> | 99.80%         | 62.37%            | 72.89%         | 38.75%     | 21.46%      |
| <b>AGT</b> | 1.82%          | 23.39%            | 68.90%         | 78.02%     | 59.55%      |
| <b>ATA</b> | 0.78%          | 0.21%             | 12.29%         | N.A.       | 43.63%      |
| <b>ATC</b> | -0.56%         | -0.34%            | 5.07%          | N.A.       | 3.20%       |
| <b>ATG</b> | 22.04%         | 5.45%             | 28.21%         | N.A.       | N.A.        |
| <b>ATT</b> | -0.13%         | 0.55%             | 10.60%         | N.A.       | N.A.        |
| <b>CAA</b> | -0.01%         | 6.21%             | 27.29%         | N.A.       | 53.17%      |
| <b>CAC</b> | -0.53%         | 2.69%             | 26.45%         | N.A.       | 19.04%      |
| <b>CAG</b> | 44.62%         | 25.71%            | 47.15%         | N.A.       | 18.17%      |
| <b>CAT</b> | -0.63%         | 6.25%             | 32.92%         | N.A.       | 22.44%      |
| <b>CCA</b> | -0.13%         | -0.21%            | 2.06%          | N.A.       | N.A.        |
| <b>CCC</b> | -0.65%         | -0.31%            | 0.89%          | N.A.       | 1.01%       |
| <b>CCG</b> | 11.47%         | 3.99%             | 6.78%          | N.A.       | 9.06%       |



|            |         |        |        |        |         |
|------------|---------|--------|--------|--------|---------|
| <b>CCT</b> | -0.22%  | -0.37% | 3.09%  | N.A.   | N.A.    |
| <b>CGA</b> | 30.35%  | 36.77% | 59.10% | 78.85% | N.A.    |
| <b>CGC</b> | 10.29%  | 24.23% | 52.31% | 70.58% | N.A.    |
| <b>CGG</b> | 102.08% | 68.15% | 72.25% | 48.14% | 15.80%  |
| <b>CGT</b> | 2.47%   | 32.69% | 69.50% | 49.23% | 23.77%  |
| <b>CTA</b> | -0.23%  | 0.64%  | 9.53%  | N.A.   | 20.11%  |
| <b>CTC</b> | -0.52%  | 0.19%  | 4.65%  | N.A.   | 25.22%  |
| <b>CTG</b> | 17.31%  | 3.94%  | 23.82% | N.A.   | 19.44%  |
| <b>CTT</b> | -0.44%  | -0.06% | 9.93%  | N.A.   | 2.30%   |
| <b>GAA</b> | 1.02%   | 11.96% | 37.31% | N.A.   | 100.83% |
| <b>GAC</b> | -0.13%  | 4.71%  | 31.57% | N.A.   | 86.73%  |
| <b>GAG</b> | 53.38%  | 35.04% | 57.91% | N.A.   | 55.14%  |
| <b>GAT</b> | 0.05%   | 10.29% | 42.64% | N.A.   | 35.73%  |
| <b>GCA</b> | -0.05%  | 0.76%  | 7.21%  | N.A.   | 55.08%  |
| <b>GCC</b> | -0.26%  | 0.28%  | 4.37%  | N.A.   | 21.67%  |
| <b>GCG</b> | 13.01%  | 1.67%  | 11.22% | N.A.   | N.A.    |
| <b>GCT</b> | -0.58%  | 0.22%  | 10.36% | N.A.   | 43.08%  |
| <b>GGA</b> | 30.31%  | 37.93% | 60.78% | 62.42% | 33.41%  |
| <b>GGC</b> | 12.24%  | 22.95% | 53.55% | 73.33% | 41.75%  |
| <b>GGG</b> | 101.50% | 70.07% | 76.36% | 67.74% | 54.37%  |
| <b>GGT</b> | 7.16%   | 33.76% | 69.40% | 76.14% | 65.25%  |
| <b>GTA</b> | 0.05%   | 1.79%  | 20.16% | N.A.   | 37.98%  |
| <b>GTC</b> | -0.34%  | 0.56%  | 11.00% | N.A.   | N.A.    |
| <b>GTG</b> | 23.36%  | 6.76%  | 37.60% | N.A.   | 50.91%  |
| <b>GTT</b> | -0.15%  | 0.29%  | 16.20% | N.A.   | 4.66%   |
| <b>TAA</b> | 0.62%   | 1.36%  | 16.05% | N.A.   | 69.86%  |

|            |        |        |        |         |        |
|------------|--------|--------|--------|---------|--------|
| <b>TAC</b> | -0.62% | 0.15%  | 11.41% | N.A.    | 72.28% |
| <b>TAG</b> | 36.56% | 11.45% | 34.32% | N.A.    | 30.23% |
| <b>TAT</b> | -0.22% | 1.52%  | 19.26% | N.A.    | 44.40% |
| <b>TCA</b> | -0.36% | 0.01%  | 1.27%  | N.A.    | N.A.   |
| <b>TCC</b> | -0.81% | -0.28% | 0.72%  | N.A.    | N.A.   |
| <b>TCG</b> | 10.87% | 3.10%  | 5.79%  | N.A.    | N.A.   |
| <b>TCT</b> | -0.15% | -0.37% | 2.47%  | N.A.    | 7.00%  |
| <b>TGA</b> | 28.62% | 29.68% | 61.71% | 73.33%  | 45.34% |
| <b>TGC</b> | 7.91%  | 15.40% | 53.76% | 88.36%  | 65.05% |
| <b>TGG</b> | 96.62% | 62.22% | 72.08% | 95.59%  | 69.12% |
| <b>TGT</b> | 2.32%  | 24.78% | 70.19% | 103.69% | N.A.   |
| <b>TTA</b> | 0.06%  | 0.53%  | 3.71%  | N.A.    | N.A.   |
| <b>TTC</b> | -1.16% | -0.09% | 0.44%  | N.A.    | N.A.   |
| <b>TTG</b> | 9.19%  | 2.01%  | 11.05% | N.A.    | 0.14%  |
| <b>TTT</b> | -0.46% | -0.14% | 1.55%  | N.A.    | 11.70% |

The predicted PAM compatibility of each PAM-Cas9 pair was reported as indel frequency (in % units) relative to the benchmark efficiency of Sp-Cas9 at NGG PAMs from each experiment (see Supplementary Methods).<sup>6,14</sup> Each data point was color-coded based on predicted efficiency: Green (high efficiency, >50% of benchmark), blue (moderate efficiency, 20%–50%), and gray (low efficiency, less than 20%). NGG PAMs are highlighted in yellow. N.A. means data is not available. Some of the reported efficiency values are small negative numbers, likely due to negligible editing frequencies indistinguishable from the background. Comparable data for indel frequencies with xCas9-NG are not available; for this work we assumed Cas9-NG and xCas9-NG were similar based on their comparable performance in nuclease assays (Figure S2).

**Supplementary Table S5: CRISPRa on endogenous *E. coli* promoters**

| Promoter      | Max. FA                  | dCas9 variant                            | Position          | PAM        |
|---------------|--------------------------|------------------------------------------|-------------------|------------|
| <b>yajGp</b>  | <b>6.6</b><br>6.2<br>5.1 | <b>dxCas9(3.7)</b><br>dxCas9-NG<br>dSpRY | NT(-81)           | GGT        |
| <b>uxuRp</b>  | <b>3.6</b><br>2.6        | <b>dxCas9-NG</b><br>dSpRY                | T(-70)            | GGT        |
| araEp         | 1.3                      | dxCas9-NG                                | NT(-81)           | CGT        |
| <b>ppiDp2</b> | <b>3.1</b>               | <b>dSpRY</b>                             | T(-70)            | GAA        |
| <b>aroKp1</b> | <b>16.3</b><br>12.8      | <b>dxCas9-NG</b><br>dxCas9(3.7)          | T(-70)            | GGT        |
| <b>aroLp</b>  | <b>8.2</b><br>5.5        | <b>dSpRY</b><br>dCas9                    | T(-70)            | TAG        |
| <b>aroF</b>   | <b>1.8</b><br><b>1.8</b> | <b>dCas9</b><br><b>dSpRY</b>             | T(-70)            | AAT        |
| aroHp1        | 1.3                      | dxCas9-NG                                | NT(-91)           | TCT        |
| aroHp2        | 1.4                      | dSpRY                                    | NT(-81)           | AAA        |
| <b>pheLp</b>  | <b>2.1</b><br><b>2.1</b> | <b>dxCas9-NG</b><br><b>dSpRY</b>         | T(-70)<br>NT(-81) | GTG<br>GAC |
| <b>secBp</b>  | <b>1.5</b>               | <b>dSpRY</b>                             | NT(-91)           | GAC        |
| serCp         | 1.3                      | dxCas9-NG                                | T(-80)            | CAT        |
| talAp         | 1.2                      | dxCas9-NG                                | NT(-91)           | AAA        |

The top two conditions were shown for each promoter, if >1.5-fold. The best conditions for each promoter is shown in bold. yajGp has three similar activation levels. Promoters with <1.5-fold activation were shaded in gray.

## Supplementary Methods

### Evaluating PAM accessibility from CRISPR knockout and CRISPR activation screens in mammalian systems

To predict the PAM accessibility for different Cas9 variants, we used data from CRISPR knockout (CRISPRko) and CRISPR activation (CRISPRa) screens in mammalian cells. Previously, screening data has been reported for three Cas9 variants (Sp-Cas9, xCas9(3.7), and Cas9-NG).<sup>4</sup> We report here a corresponding screen performed using the same approach with four Cas9 variants: Sp-Cas9, xCas9(3.7), Cas9-NG, and xCas9-NG. Lentiviral sgRNA libraries were constructed to target the CD45 gene, spanning the 3 kb region surrounding the TSS and constitutive CDS exons, using all possible 20-mer sequences upstream of an NG PAM sequence, as described before.<sup>4</sup> In addition to sgRNAs, each vector also contained a Cas9 variant (nuclease for CRISPRko and catalytically dead Cas9 fusion with VPR transcriptional activators for CRISPRa) and a short barcode downstream of the sgRNA to identify the Cas9 variant in the same Illumina read as the sgRNA. sgRNA library cloning, lentivirus production and cell transduction were done separately for each Cas9 variant. The transduced and selected cells were only pooled together prior to FACS sorting based on the CD45 protein expression. CRISPRko was performed in K562 cells and CRISPRa was performed in A375 cells; both cell lines were obtained from ATCC. The presort samples and 10% top/bottom bins were analyzed by high-throughput Illumina sequencing. To calculate fold-depletion for CRISPRko, the relative frequency (normalized to sequencing depth and median frequency of non-targeting sgRNAs for each Cas9 variant) of each sgRNA from the bottom 10% bin (lowest expression level) was divided by its corresponding frequency in the top 10% bin. To calculate fold-enrichment for CRISPRa, the relative frequency of each sgRNA from the top 10% bin (highest expression) was divided by its corresponding frequency in the bottom 10% bin. For CRISPRko, only sgRNAs targeting within the CDS were included in the analysis; for CRISPRa, only sgRNAs targeting within the core promoter region (as determined previously,<sup>4</sup> chr1:198638250-198639226) were included. The data were then filtered for designated PAMs (NGG or NGH) to visualize the data as shown in Figure S2.

### PAM compatibility analysis

For each dCas9 variant, the ability to target each of the 64 possible 3-nucleotide PAMs was predicted based on previously reported CRISPR nuclease (CRISPRko) data in mammalian systems.<sup>6,14</sup> Genome editing efficiencies, measured as indel frequencies, have been reported for Sp-Cas9, xCas9(3.7), and Cas9-NG<sup>14</sup> and for Sp-Cas9, SpG, and SpRY.<sup>6</sup> For each Cas9 dataset, sgRNAs with the same 3-nt PAM were grouped together. We then calculated an average indel frequency for all sgRNAs with the same PAM. We assessed PAM compatibility by comparison to the benchmark indel frequency of Sp-Cas9 at NGG PAMs (Table S4). “High performance” PAMs were those with >50% indel frequency relative to the benchmark. “Moderate performance” PAMs were those with 20-50% efficiency relative to the benchmark. PAMs that were not tested in the previously-reported nuclease assays<sup>6</sup> were assumed to be incompatible.

### Endogenous promoter and scRNA selection strategy

Gene candidates were selected from metabolic pathways related to aromatic amino acid biosynthesis, including the relevant genes in central metabolic pathways. We selected only

promoters that are regulated by sigma70 and are available in the previously characterized *E. coli* endogenous promoter library (obtained from Horizon Discovery).<sup>13</sup> To identify potentially activatable promoters with moderately-weak basal expression levels, we compared basal expression to yajGp, which was the strongest endogenous promoter that could be activated in previous work.<sup>10</sup> We eliminated any promoters with >10-fold higher expression levels than yajGp, yielding 9 promoters: secBp, aroFp, aroLp, pheLp, aroHp1, aroHp2, talAp, aroKp1, and serCp. Some of these promoters regulate multi-gene operons. Complete sequences of the endogenous promoters used in this study are available in the DNA sequences section below.

Out of selected genes, aroH contains two putative promoters — aroHp1/aroHp2. In Figure S6A, the basal expression levels for aroHp1 and aroHp2 were assumed to be the same value. Expression levels produced by each individual promoter cannot be determined from the fluorescent reporter used in this study because both promoters are upstream of the same fluorescent reporter gene.

In the secBp promoter constructed for the *E. coli* promoter library,<sup>13</sup> only the sequence to -7 bases from the TSS was included. To include enough sequence for scRNA target sites, we constructed a promoter extending to -137 bases from the TSS.

For each promoter, four scRNAs were identified according to the previously described target site preference. X06 and X08 represent the scRNAs targeting the non-template strand at -81 and -91 positions (Table S3). X07 and X09 represent the scRNAs targeting the template strand at -70 and -80 positions. One target site from the template strand and another from the non-template strand were selected for further analysis based on which PAM was predicted to be accessible to the highest number of dCas9 variants. Accessibility was assessed based on the moderate performance threshold cutoff (Supplemental Table S4).

## DNA sequences

Reporter

>J3(PAM)-BBa\_J23117-RBS-mRFP

```
AGCATTTCGATCATTACGCAGCGCTTATTCAGTTGCTCACTGCGATGTCATAATCATCGCTACGAGCTGTGAAAG
ATGCATAAAGCTCGTACGACGCGTTTCGCTCGTCTCCTCACTTCTNNNACGGAGCGTTCTGGACACAACGTCGTCTTG
AAGTTGCGATTATAGATTGACAGCTAGCTCAGTCCTAGGGATTGTGCTAGCGAATTCATTAAAGAGGAGAAAGGTAC
CATGGCGAGTAGCGAAGACGTTATCAAAGAGTTCATGCGTTTTCAAAGTTCGTATGGAAGGTTCCGTTAACGGTCACG
AGTTTCGAAATCGAAGGTGAAGGTGAAGGTTCGTCCTGACGAAGGTACCCAGACCGCTAAACTGAAAGTTACCAAAGGT
GGTCCGCTGCCGTTTCGCTTGGGACATCCTGTCCCCGAGTTCAGTACGGTTCCAAAGCTTACGTTAAACACCCGGC
TGACATCCCGGACTACCTGAAACTGTCTTCCCGGAAGTTTTCAAATGGGAACGTGTTATGAACTTCGAAGACGGTG
GTGTTGTTACCGTTACCCAGGACTCCTCCCTGCAAGACGGTGAGTTCATCTACAAAGTTAAACTGCGTGGTACCAAC
TTCCCGTCCGACGGTCCGTTATGCAGAAAAAACCATGGGTTGGGAAGCTTCCACCGAACGTATGTACCCGGAAGA
CGGTGCTCTGAAAGGTGAAATCAAATGCGTCTGAAACTGAAAGACGGTGGTCACTACGACGCTGAAGTTAAACCA
CCTACATGGCTAAAAAACCGTTTTCAGCTGCCGGGTGCTTACAAAACCGACATCAAAGTGGACATCACCTCCACAAC
GAAGACTACCCATCGTTGAACAGTACGAACGTGCTGAAGGTCGTCCTCCACCGGTGCTTAA
```

PAM location is bolded/underlined above

>BBa\_J23110-RBS-sfGFP

```
TTTACGGCTAGCTCAGTCCTAGGTACAATGCTAGCGAATTCATTAAAGAGGAGAAAGGTACCATGAGCAAAGGAGAA
GAACTTTTCACTGGAGTTGTCCCAATTCTTGTGTAATTAGATGGTGTATGTTAATGGGCACAAATTTTCTGTCCGTGG
AGAGGGTGAAGGTGATGCTACAAACGGAAAACCTACCCTTAAATTTATTTGCACTACTGGAAAACCTACCTGTTCCGT
GGCCAACACTTGTCACTACTCTGACCTATGGTGTTCATGCTTTTCCCGTTATCCGGATCACATGAAACGGCATGAC
TTTTTCAAGAGTGCCATGCCCGAAGGTTATGTACAGGAACGCACTATATCTTTCAAAGATGACGGGACCTACAAGAC
GCGTGCTGAAGTCAAGTTTGAAGGTGATACCCTTGTGTAATCGTATCGAGTTAAAGGGTATTGATTTTAAAGAAGATG
GAAACATTTCTTGGACACAAACTCGAGTACAACCTTAACTCACACAATGTATACATCACGGCAGACAAACAAAAGAAT
GGAATCAAAGCTAACTTCAAATTCGCCACAACGTTGAAGATGGTTCGGTTCAACTAGCAGACCATTATCAACAAAA
TACTCCAATTGGCGATGGCCCTGTCTTTTACCAGACAACCATTACCTGTGACACAATCTGTCTTTTCGAAAGATC
CCAACGAAAAGCGTGACCACATGGTCCTTCTTGAGTTTGTAACTGCTGCTGGGATTACACATGGCATGGATGAGCTC
TACAAATAA
```

>BBa\_J23119-RBS-mRFP

```
TTGACAGCTAGCTCAGTCCTAGGTATAATAGATCTGAATTCATTAAAGAGGAGAAAGGTACCATGCGAGTAGCGAA
GACGTTATCAAAGAGTTCATGCGTTTTCAAAGTTCGTATGGAAGGTTCCGTTAACGGTCACGAGTTCGAAATCGAAGG
TGAAGGTGAAGGTTCGTCCTGACGAAGGTACCCAGACCGCTAAACTGAAAGTTACCAAAGGTGGTCCGCTGCCGTTTCG
CTTGGGACATCCTGTCCCCGAGTTCAGTACGGTTCCAAAGCTTACGTTAAACACCCGGCTGACATCCCGGACTAC
CTGAAACTGTCTTCCCGGAAGGTTTTCAAATGGGAACGTGTTATGAACTTCGAAGACGGTGGTGTGTTACCGTTAC
CCAGGACTCCTCCCTGCAAGACGGTGAGTTCATCTACAAAGTTAAACTGCGTGGTACCAACTTCCCGTCCGACGGTC
CGGTTATGCAGAAAAAACCATGGGTTGGGAAGCTTCCACCGAACGTATGTACCCGGAAGACGGTGTCTGAAAGGT
GAAATCAAATGCGTCTGAAACTGAAAGACGGTGGTCACTACGACGCTGAAGTTAAACCACCTACATGGCTAAAAA
ACCGGTTTCAGTTCGCCGGGTGCTTACAAAACCGACATCAAAGTGGACATCACCTCCACAACGAAGACTACCCATCG
TTGAACAGTACGAACGTGCTGAAGGTCGTCCTCCACCGGTGCTTAA
```

119, RR1, and RR2 targets are underlined above

>UP\_secBp-UTR-RBS-GFPmut2

```
GATGGCAACGCCCAAGCGTGAAGAGATGATCAAACGCAGCGGTTCGCACCACGGTTCCTCCAGATTTTTATTGACGC
ACAGCACATTGGCGGCTGTGATGACTTGTATGCATTGGATGCACGTGGTGGACTGGATCCCCTGCTGAAATAACGTC
TGAACGTTGGCATTACATTGCGCAGTATTTAAGGACAACACTTAAGGGTTTTCTACACATGTCAGAACAAAACAACA
CTGAAATGACTTTCCAGATCCAACGTATTTATACCAAGGATATCTCTTTTGAAGCGCCGCTCGAGAGATCCTCTAGA
TTTTAAGAAGGAGATATACATATGAGTAAAGGAGAAGAAGCTTTTCACTGGAGTTGTCCCAATTCTTGTGTAATTAGAT
GGTGTATGTTAATGGGCACAAATTTTCTGTGTCAGTGGAGAGGGTGAAGGTGATGCAACATACGGAAAACCTTACCCTTAA
ATTTATTTGCACTACTGGAAAACCTACCTGTTCCATGGCCAACACTTGTCACTACTTTTCGCGTATGGTCTTCAATGCT
```

TTGCGAGATACCCAGATCATATGAAACAGCATGACTTTTTCAAGAGTGCCATGCCCCGAAGGTTATGTACAGGAAAGA  
ACTATATTTTTCAAAGATGACGGGAACTACAAGACACGTGCTGAAGTCAAGTTTGAAGGTGATACCCTTGTTAATAG  
AATCGAGTTAAAAGGTATTGATTTTTAAAGAAGATGGAAACATTCTTGGACACAAATTGGAATACAACATAACTCAC  
ACAATGTATACATCATGGCAGACAAAACAAAAGAATGGAATCAAAGTTAACTTCAAAATTAGACACAACATTGAAGAT  
GGAAGCGTTCAACTAGCAGACCATTATCAACAAAATACTCCAATTGGCGATGGCCCTGTCCTTTTACCAGACAACCA  
TTACCTGTCCACACAATCTGCCCTTTCGAAAGATCCCAACGAAAAGAGAGACCACATGGTCCTTCTTGAGTTTGTA  
CAGCTGCTGGGATTACCCATGGTATGGATGAATTGTACAAATA

Cas9 variants (bolded/underlined mutations)

>*Sp.pCas9-dCas9-dblTerm*

TTACGAAATCATCCTGTGGAGCTTAGTAGGTTTAGCAAGATGGCAGCGCCTAAATGTAGAATGATAAAAGGATTAAG  
AGATTAATTTCCCTAAAAATGATAAAACAAGCGTTTTTGAAAGCGCTTGTTTTTTTGGTTTTGCAGTCAGAGTAGAATA  
GAAGTATCAAAAAAAGCACCGACTCGGTGCCACTTTTTCAAGTTGATAACGGACTAGCCTTATTTTAACTTGCTATG  
CTGTTTTGAATGGTTCCAACAAGATTATTTATAACTTTTTATAACAAATAATCAAGGAGAAATTCAAAGAAATTTAT  
CAGCCATAAAACAATACTTAATACTATAGAATGATAACAAAATAAACTACTTTTTAAAAGAATTTTGTGTTATAATC  
TATTTATTATTAAGTATTGGGTAATATTTTTTTGAAGAGATATTTTGAAAAAGAAAAATTAAGCATATTTAACTAAT  
TTCGGAGGTCATTAAACTATTATTGAAATCATCAAACCTATTATGGATTTAATTTAACTTTTTATTTTAGGAGGC  
AAAA**ATG**GATAAGAAATACTCAATAGGCTT**agct**ATCGGCACAAATAGCGTCGGATGGGCGGTGATCACTGATGAAT  
ATAAGGTTCCGTCTAAAAAGTTCAAGGTTCTGGGAAATACAGACCGCCACAGTATCAAAAAAATCTTATAGGGGCT  
CTTTTATTTGACAGTGGAGAGACAGCGGAAGCGACTCGTCTCAAACGGACAGCTCGTAGAAGGTATACACGTCGGAA  
GAATCGTATTTGTTATCTACAGGAGATTTTTTCAAATGAGATGGCGAAAGTAGATGATAGTTTCTTTCATCGACTTG  
AAGAGTCTTTTTTGGTGGAAAGAAGACAAGAAGCATGAACGTCATCTATTTTTGGAAATATAGTAGATGAAGTTGCT  
TATCATGAGAAATATCCAACATATCTATCATCTGCGAAAAAAATTTGGTAGATTCTACTGATAAAGCGGATTTGCGCTT  
AATCTATTTGGCCTTAGCGCATATGATTAAGTTTCGTGGTCATTTTTTGATTGAGGGAGATTTAAATCCTGATAATA  
GTGATGTGGACAAACTATTTATCCAGTTGGTACAAACCTACAATCAATTATTTGAAGAAAACCCTATTAACGCAAGT  
GGAGTAGATGCTAAAGCGATTCTTCTGCACGATTGAGTAAATCAAGACGATTAGAAAATCTCATTGCTCAGCTCCC  
CGGTGAGAAGAAAAATGGCTTATTTGGGAATCTCATTGCTTTGTCTATTGGGTTTGACCCCTAATTTTAAATCAAAT  
TTGATTTGGCAGAAGATGCTAAATACAGCTTTCAAAGATACTTACGATGATGATTTAGATAAATTTATTTGGCGCAA  
ATTTGGAGATCAATATGCTGATTTGTTTTTTGGCAGCTAAGAATTTATCAGATGCTATTTTACTTTTCAGATCTCTAAG  
AGTAAATACTGAAATAACTAAGGCTCCCCTATCAGCTTCAATGATTTAAACGCTACGATGAACATCATCAAGACTTGA  
CTCTTTTAAAAGCTTTAGTTGACAACAACCTCCAGAAAAGTATAAAAGAAATCTTTTTTGATCAATCAAAAAACGGA  
TATGCAGGTTATATTGATGGGGGAGCTAGCCAAGAAGAATTTATAAATTTATCAAACCAATTTTAGAAAAAATGGA  
TGGTACTGAGGAATTATTGGTGAACCTAAATCGTGAAGATTTGCTGCGCAAGCAACGGACCTTTGACAACGGCTCTA  
TTCCCATCAAATTCACTTGGGTGAGCTGCATGCTATTTTGAGAAGACAAGAAGACTTTTATCCATTTTTTAAAAGAC  
AATCGTGAGAAGATTGAAAAAATCTTGACTTTTTCGAATTCCTTATTATGTTGGTCCATTGGCGCGTGGCAATAGTCG  
TTTTGCATGGATGACTCGGAAGTCTGAAGAAACAATTACCCCATGGAATTTTGAAGAAGTTGTCGATAAAGGTGCTT  
CAGCTCAATCATTATTTGAACGCATGACAACTTTGATAAAAATCTTCAAATGAAAAAGTACTACCAAACATAGT  
TTGCTTTATGAGTATTTTACGGTTTATAACGAATTGACAAAGGTCAAATATGTTACTGAAGGAATGCGAAAACCAGC  
ATTTCTTTTCAGGTGAACAGAAGAAAGCCATTGTTGATTTACTCTTCAAACAAATCGAAAAGTAACCGTTAAGCAAT  
TAAAAGAAGATTATTTCAAAAAAATAGAATGTTTTGATAGTGTGAAATTTTCAGGAGTTGAAGATAGATTTAATGCT  
TCATTAGGTACCTACCATGATTTGCTAAAAATTTAAAGATAAAGATTTTTTTGGATAATGAAGAAAATGAAGATAT  
CTTAGAGGATATTGTTTTAACATTGACCTTATTTGAAGATAGGGAGATGATTGAGGAAAAGACTTAAAACATATGCTC  
ACCTCTTTGATGATAAGGTGATGAAACAGCTTAAACGTCGCCGTTATACTGGTTGGGGACGTTTGTCTCGAAAATTG  
ATTAATGGTATTAGGGATAAGCAATCTGGCAAAACAATATTAGATTTTTTGAAATCAGATGGTTTTTGCCAATCGCAA  
TTTTATGCAGCTGATCCATGATGATAGTTTGACATTTAAAGAAGACATTCAAAAGCACAAGTGTCTGGACAAGGCG  
ATAGTTTACATGAACATATTGCAAAATTTAGCTGGTAGCCCTGCTATTAATAAAGGATATTTTACAGACTGTAAAAGTT  
GTTGATGAATTTGGTCAAAGTAAATGGGGCGGCATAAGCCAGAAAATATCGTTATTGAAATGGCAGTGAAAATCAGAC  
AACTCAAAGGGCCAGAAAAATTCGCGAGAGCGTATGAAAAGCAATCGAAGAAGGTATCAAAGAATTAGGAAGTCAGA  
TTCTTAAAGAGCATCCTGTTGAAAATACTCAATTGCAAAAATGAAAAGCTCTATCTCTATTATCTCCAAAATGGAAGA  
GACATGTATGTGGACCAAGAATTAGATATTAATCGTTTTAAGTGATTATGATGTGCGAT**gcg**ATTGTTCCACAAAGTTT  
CCTTAAAGACGATTCAATAGACAATAAGGTCTTAACGCGTTCTGATAAAAATCGTGGTAAATCGGATAACGTTCCAA  
GTGAAGAAGTAGTCAAAAAGATGAAAAACTATTGGAGACAACCTCTAAACGCCAAGTTAATCACTCAACGTAAGTTT  
GATAATTTAACGAAAGCTGAACGTGGAGGTTTTGAGTGAACCTTGATAAAGCTGGTTTTATCAAACGCCAATTGGTTGA  
AACTCGCCAAATCACTAAGCATGTGGCACAAATTTTTGGATAGTCGCATGAATACTAAATACGATGAAAATGATAAAC  
TTATTTCGAGAGGTTAAAGTGATTACCTTAAAATCTAAATTAGTTTTCTGACTTCCGAAAAGATTTCCAATCTATAAA  
GTACGTGAGATTAACAATTACCATCATGCCATGATGCGTATCTAAATGCCGTCGTTGGAAGTCTTTGATTAAGAA  
ATATCCAAAACCTTGAATCGGAGTTTTGTCTATGGTGATTATAAAGTTTTATGATGTTTCGTAATAATGATTGCTAAGTCTG  
AGCAAGAAATAGGCAAAGCAACCGCAAAATATTTCTTTTACTCTAATATCATGAACTTCTTCAAACAGAAATTACA  
CTTGCAAAATGGAGAGATTTCGCAACGCCCTCTAATCGAAACTAATGGGGAAACTGGAGAAATTTGCTGGGATAAAGG  
GCGAGATTTTTGCCACAGTGCAGCAAAAGTATTGTCCATGCCCAAGTCAATATTGTCAAGAAAACAGAAGTACAGACAG  
GCGGATTCTCCAAGGAGTCAATTTTACCAAAAAGAAATTCGGACAAGCTTATTGCTCGTAAAAAAGACTGGGATCCA  
AAAAAATATGGTGGTTTTGATAGTCCAACGGTAGCTTATTTCAGTCTAGTGGTTGCTAAGGTGGAAAAAGGGAAATC  
GAAGAAGTTAAAATCCGTTAAAGAGTTACTAGGGATCACAATTATGGAAAGAAGTTCCTTTGAAAAAATCCGATTG  
ACTTTTTAGAAGCTAAAGGATATAAGGAAGTTAAAAAGACTTAATCATTAACTACCTAAATATAGTCTTTTTGAG



TTAGAAAACGGTCGTAAACGGATGCTGGCTAGTGCCGGAGAATTACAAAAAGGAAATGAGCTGGCTCTGCCAAGCAA  
ATATGTGAATTTTTTATATTTAGCTAGTCATTATGAAAAGTTGAAGGGTAGTCCAGAAGATAACGAACAAAAACAAT  
TGTTTGTGGAGCAGCATAAGCATTATTTAGATGAGATTATTGAGCAAATCAGTGAATTTTCTAAGCGTGTTATTTT  
GCAGATGCCAATTTAGATAAAGTTCTTAGTGATATAACAAACATAGAGACAAACCAATACGTGAACAAGCAGAAAA  
TATTATTCATTTATTTACGTTGACGAATCTTGGAGCTCCCGCTGCTTTTTAAATATTTTGATACAACAATTGATCGTA  
AACGATATACGTCTACAAAAGAAGTTTTAGATGCCACTCTTATCCATCAATCCATCACTGGTCTTTATGAAACACGC  
ATTGATTTGAGTCAGCTAGGAGGTGACT**TA**ACTCGAGTAAGGATCTCCAGGCATCAAATAAAACGAAAGGCTCAGTCG  
AAAGACTGGGCCTTTCTGTTTTATCTGTTGTTTGTCTGGTGAACGCTCTCTACTAGAGTCACACTGGCTCACCTTCGGG  
TGGGCCTTTCTGCGTTTTATA

>dxCas9(3.7)

**ATG**GACAAGAAGTACTCCATTGGGCTC**gct**ATCGGCACAAACAGCGTCGGCTGGGCCGTCATTACGGACGAGTACAA  
GGTGCCGAGCAAAAAAATTCAAAGTTCTGGGCAATACCGATCGCCACAGCATAAAGAAGAACCTCATTGGCGCCCTCC  
TGTTTCGACTCCGGGGAGACGGCCGAAGCCACGCGGCTCAAAAAGAACAGCACGGCGCAGATATACCCGCAGAAAGAAT  
CGGATCTGCTACCTGCAGGAGATCTTTAGTAATGAGATGGCTAAGGTGGATGACTCTTTCTTCCATAGGCTGGAGGA  
GTCCTTTTTGGTGGAGGAGGATAAAAAAGCACGAGCGCCACCCAATCTTTGGCAATATCGTGGACGAGGTGGCGTACC  
ATGAAAAGTACCCAACCATATATCATCTGAGGAAGAAGCTTGTAGACAGTACTGATAAGGCTGACTTGCGGTTGATC  
TATCTCGCGCTGGCGCATATGATCAAATTCGGGGACACTTCCTCATCGAGGGGGACCTGAACCCAGACAACAGCGA  
TGTCGACAAACTCTTTATCCAACCTGGTTCAGACTTACAATCAGCTTTTCGAAGAGAACCCGATCAACGCATCCGGAG  
TTGACGCAAAAGCAATCTTGAGCGCTAGGCTGTCCAATCCCGCGGCTCGAAAACCTCATCGCACAGCTCCCTGGG  
GAGAAGAAGAAGCGGCTTTGGTAATCTTATCGCCCTGTCCCTCGGGCTGACCCCCAACTTTAAATCTAAACTCGA  
CCTGGCCGAAGAT**acc**AAGCTTCAACTGAGCAAAGACACCTACGATGATGATCTCGACAATCTGCTGGCCAGATCG  
GCGACCAGTACGCAGACCTTTTTTTGGCGGCAAGAACCTGTGAGACGCCATTCTGCTGAGTGATATTCTGCGAGTG  
AACACGGAGATCACCAAAGCTCCGCTGAGCGCTAGTATGATCAAG**ctc**TATGATGAGCACCACCAAGACTTGACTTT  
GCTGAAGGCCCTTGTCAGACAGCAACTGCCTGAGAAGTACAAGGAAATTTTCTTCGATCAGTCTAAAAATGGCTACG  
CCGGATACATTGACGGCGGAGCAAGCCAGGAGGAATTTTACAAATTTATTAAGCCCATCTTGAAAAAATGGACGGC  
ACCGAGGAGCTGCTGGTAAAGCTTAACAGAGAAGATCTGTTGCGCAAACAGCGCACTTTGACAATGGA**atc**ATCCC  
CCACCAGATTCACCTGGGCGAAGTGCACGCTATCCTCAGGCGGCAAGAGGATTTCTACCCCTTTTTGAAAGATAACA  
GGGAAAAGATTGAGAAAATCCTCACATTTCCGATACCTACTATGTAGGCCCTCGCCCCGGGAAATTCAGATTC  
GCGTGGATGACTCGAAATCAGAAGAGACCATCACTCCCTGGAACCTCGAG**aaa**GTCGTGGATAAGGGGGCCTCTGC  
CCAGTCTTCATCGAAAGGATGACTAACTTTGATAAAAAATCTGCCTAACGAAAAGGTGCTTCTAAACACTCTCTGC  
TGTACGAGTACTTCACAGTTTATAACGAGCTCACCAAGGTCAAATACGTACAGAAAGGGATGAGAAAGCCAGCATT  
CTGTCTGG**gat**CAGAAGAAAGCTATTGTGGACCTCCTCTTCAAGACGAACCCGAAAGTTACCGTGAACAGCTCAA  
AGAAGACTATTTCAAAAAGATTGAATGTTTCGACTCTGTTGAAATCAGCGGAGTGGAGGATCGCTTCAACGCATCCC  
TGGGAACGTATCACGATCTCCTGAAAATCATTAAAGACAAGGACTTCCTGGACAATGAGGAGAACGAGGACATTCTT  
GAGGACATTGTCCTCACCTTACGTTGTTTGAAGATAGGGAGATGATTGAAGAACGCTTGAAAACCTACGCTCATCT  
CTTCGACGACAAAGTCATGAAGCAGCTCAAGAGGCGCCGATATACAGGATGGGGGCGGCTGTCAAGAAAACCTGATCA  
ATGGGATCCGAGACAAGCAGAGTGGAAAGACAATCTGGATTTTCTTAAGTCCGATGGATTTGCCAACCCGAATTC  
**att**CAGTTGATCCATGATGACTCTCTCACCTTTAAGGAGGACATCCAGAAAGCACAAGTTTCTGGCCAGGGGACAG  
TCTTCACGAGCACATCGTAACTTTGCAAGGTAGCCAGCTATCAAAAAGGAATACTGCAGACCGTTTAAAGTCTGTTG  
ATGAACTCGTCAAAGTAATGGGAAGGCATAAGCCCGAGAATATCGTTATCGAGATGGCCCCGAGAGAACCAAACCACC  
CAGAAGGGACAGAAGAACAGTAGGGAAAGGATGAAGAGGATTGAAGAGGGTATAAAAAGAACTGGGGTCCCAAATCCT  
TAAGGAACACCCAGTTGAAAACACCCAGCTTCAGAATGAGAAGCTCTACCTGTACTACCTGCAGAACGGCAGGGACA  
TGTACGTGGATCAGGAACCTGGACATCAATCGGCTCTCCGACTACGACGTGGAC**gct**ATCGTGCCCCAGTCTTTTCTC  
AAAGATGATTCTATTGATAATAAAGTGTGACAAGATCCGATAAAAAACAGAGGGAAGAGTGATAACGTCCCCTCAGA  
AGAAGTTGTCAAGAAAATGAAAATTTATTGGCGGCAGCTGCTGAACGCCAAACTGATCACACAACCGGAAGTTCGATA  
ATCTGACTAAGGCTGAACGAGGTGGCCTGTCTGAGTTGGATAAAGCCGGTTTCATCAAAGGCAGCTTGTGAGACA  
CGCCAGATCACCAAGCACGTGGCCCAAATTTCTCGATTACGCATGAACACCAAGTACGATGAAAATGACAAACTGAT  
TCGAGAGGTGAAAGTTATTACTCTGAAGTCTAAGCTGGTCTCAGATTTAGAAAAGGACTTTTCAAGTTTATAAGGTGA  
GAGAGATCAACAATTACCACCATGCGCATGATGCCTACCTGAATGCAGTGGTAGGCACTGCATTATCAAAAAATAT  
CCCAAGCTTGAATCTGAATTTGTTTACGGAGACTATAAAGTGTACGATGTTAGGAAAATGATCGCAAAGTCTGAGCA  
GGAAATAGGCAAGGCCACCGCTAAGTACTTCTTTTACAGCAATATTATGAATTTTTTCAAGACCGAGATTACACTGG  
CCAATGGAGAGATTGGAAGCGACCACTTATCGAAAACAAACGGAGAAAACAGGAGAAAATCGTGTGGGACAAGGGTAGG  
GATTTTCGCGACAGTCCGGAAGGTCTGTCCATGCCGAGGTGAACATCGTTAAAAAGACCGAAGTACAGACCGGAGG  
TTTCTCCAAGGAAAGTATCCTCCCGAAAAGGAACAGCGACAAGCTGATCGCACGCAAAAAGATTGGGACCCCAAGA  
AATACGGCGGATTGATTCTCCTACAGTCGCTTACAGTGTACTGGTTGTGGCCAAAGTGGAGAAAGGGAAGTCTAAA

AAACTCAAAGCGTCAAGGAAGTCTGGGCATCACAATCATGGAGCGATCAAGCTTCGAAAAAACCCCATCGACTT  
TCTCGAGGGCGAAAGGATATAAAGAGGTCAAAAAAGACCTCATCATTAAAGCTTCCCAAGTACTCTCTCTTTGAGCTTG  
AAAACGGCCGAAACGAATGCTCGCTAGTGCAGGGCgtgCTGCAGAAAGGTAACGAGCTGGCACTGCCCTCTAAATAC  
GTTAATTTCTTGTATCTGGCCAGCCACTATGAAAAGCTCAAAGGGTCTCCCGAAGATAATGAGCAGAAGCAGCTGTT  
CGTGGAAACAACACAAACACTACCTTGATGAGATCATCGAGCAAATAAGCGAATTCTCCAAAAGAGTGATCCTCGCCG  
ACGCTAACCTCGATAAGGTGCTTTCTGCTTACAATAAGCACAGGGATAAGCCCATCAGGGAGCAGGCAGAAAAATT  
ATCCACTTGTCTTACTCTGACCAACTTGGGCGCGCCTGCAGCCTTCAAGTACTTCGACACTACCATAGACAGAAAGCG  
GTACACCTCTACAAAGGAGGTCTGGACGCCACACTGATTCATCAGTCAATTACGGGGCTCTATGAAACAAGAATCG  
ACCTCTCTCAGCTCGGTGGAGACTTAA

>dCas9-NG

ATGGATAAGAAATACTCAATAGGCTTAgctATCGGCACAAATAGCGTCCGGATGGGCGGTGATCACTGATGAATATAA  
GGTTCGGTCTAAAAAGTTCAAGGTTCTGGGAAATACAGACCGCCACAGTATCAAAAAAATCTTATAGGGGCTCTTT  
TATTTGACAGTGGAGAGACAGCGGAAGCGACTCGTCTCAAACGGACAGCTCGTAGAAGGTATACACGTCGGAAGAAT  
CGTATTTGTTATCTACAGGAGATTTTTTCAAATGAGATGGCGAAAGTAGATGATAGTTTTCTTTCATCGACTTGAAGA  
GTCTTTTTTGGTGGAAAGACAAGAAGCATGAACGTCATCCTATTTTTGGAAATATAGTAGATGAAGTTGCTTATC  
ATGAGAAATATCCAATCTATCATCTGCGAAAAAATTTGGTAGATTCTACTGATAAAGCGGATTTGCGCTTAATC  
TATTTGGCCTTAGCGCATATGATTAAGTTTCGTGGTCATTTTTGATTGAGGGAGATTTAAATCCTGATAATAGTGA  
TGTGGACAAACTATTTATCCAGTTGGTACAAACCTACAATCAATTATTTGAAGAAAACCCCTATTAACGCAAGTGGAG  
TAGATGCTAAAGCGATTTCTTCTGCACGATTGAGTAAATCAAGACGATTAGAAAATCTCATTGCTCAGCTCCCCGGT  
GAGAAGAAAAATGGCTTATTTGGGAATCTCATTGCTTTGTCTATTGGGTTTGACCCCTAATTTAAATCAAATTTGA  
TTTTGGCAGAAGATGCTAAATACAGCTTTCAAAGATACTTACGATGATGATTTAGATAATTTATTGGCGCAAATTTG  
GAGATCAATATGCTGATTTGTTTTGGCAGCTAAGAATTTATCAGATGCTATTTTACTTTTACAGATATCCTAAGAGTA  
AATACTGAAATAACTAAGGCTCCCCTATCAGCTTCAATGATTAACGCTACGATGAACATCATCAAGACTTGACTCT  
TTTTAAAGCTTTAGTTTCGACAACAACCTCCAGAAAAGTATAAAAGAAATCTTTTTTGGATCAATCAAAAAACGGATATG  
CAGGTTATATTGATGGGGGAGCTAGCCAAGAAGAATTTTATAAATTTATCAAACCAATTTTAGAAAAAATGGATGGT  
ACTGAGGAATTTATTGGTGAACCTAAATCGTGAAGATTTGCTGCGCAAGCAACGGACCTTTGACAACGGCTCTATTCC  
CCATCAAATTCACTTGGGTGAGCTGCATGCTATTTTGAAGAAGACAAGAAGACTTTTATCCATTTTAAAAGACAATC  
GTGAGAAGATTGAAAAATCTTGACTTTTCGAATTCCTTATTATGTTGGTCCATTGGCGCGTGGCAATAGTCGTTTT  
GCATGGATGACTCGGAAGTCTGAAGAAACAATTACCCCATGGAATTTTGAAGAAGTTGTCGATAAAGGTGCTTCAGC  
TCAATCATTTATTGAACGCATGACAAACTTTGATAAAAAATCTTCAAATGAAAAAGTACTACCAAAACATAGTTTGC  
TTTTATGAGTATTTTACGGTTTATAACGAATTGACAAAGGTCAAATATGTTACTGAAGGAATGCGAAAACAGCATT  
CTTTTCAGGTGAACAGAAGAAAGCCATTGTTGATTTACTCTTCAAACCAAATCGAAAAGTAACCGTTAAGCAATTA  
AGAAGATTATTTCAAAAAAATAGAATGTTTTGATAGTGTGAAATTTTCAAGGAGTTGAAGATAGATTTAATGCTTCAT  
TAGGTACCTACCATGATTTGCTAAAAATTTAAAGATAAAGATTTTTTGGATAATGAAGAAAATGAAGATATCTTA  
GAGGATATTGTTTTAACATTGACCTTATTTGAAGATAGGGAGATGATTGAGGAAAGACTTAAACATATGCTCACCT  
CTTTGATGATAAGGTGATGAAACAGCTTAAACGTCGCCGTTATACTGGTTGGGGACGTTTGTCTCGAAAATTGATTA  
ATGGTATTAGGGATAAGCAATCTGGCAAAACAATATTAGATTTTTTGAATCAGATGGTTTTGCCAATCGCAATTTT  
TTACAGTGAACATATTGCAAATTTAGCTGGTAGCCCTGCTATTAATAAAGGATTTTTTACAGACTGTAAAATTTGTTG  
ATGAATTTGGTCAAAGTAATGGGGCGGCATAAGCCAGAAAATATCGTTATTGAAATGGCACGTGAGAACCAAACACC  
CAGAAGGGACAGAAGAACAGTAGGGAAAGGATGAAGAGGATTGAAGAGGGTATAAAAAGAACTGGGGTCCCAAATCCT  
TAAGGAACACCCAGTTGAAAACACCCAGCTTCAAGATGAGAAGCTCTACCTGTACTACCTGCAGAACGGCAGGGACA  
TGTACGTGGATCAGGAAGTGGACATCAATCGGCTCTCCGACTACGACGTGGACgctATCGTGCCCCAGTCTTTTTCTC  
AAAGATGATTTCTATTGATAATAAAGTGTGACAAGATCCGATAAAAAACAGAGGGAAGAGTGATAACGTCCCCTCAGA  
AGAAGTTGTCAAGAAAATGAAAAATTTATTGGCGGCAGCTGCTGAACGCCAAACTGATCACACAACGGAAGTTCGATA  
ATCTGACTAAGGCTGAACGAGGTGGCCTGTCTGAGTTGGATAAAGCCGGTTTCATCAAAGGCAGCTTGTGAGACA  
CGCCAGATCACAAGCACGTGGCCCAAATTTCTCGATTACGCATGAACACCAAGTACGATGAAAATGACAAACTGAT  
TCGAGAGGTGAAAGTTATTACTCTGAAGTCTAAGCTGGTCTCAGATTTTCAAGAAAGGACTTTTCAAGTTTATAAGGTGA  
GAGAGATCAACAATTACCACCATGCGCATGATGCCTACCTGAATGCAGTGGTAGGCACTGCATTTCAAAAAATAT  
CCCAAGCTTGAATCTGAATTTGTTTACGGAGACTATAAAGTGTACGATGTTAGGAAAATGATCGCAAAGTCTGAGCA  
GGAAATAGGCAAGGCCACCGCTAAGTACTTCTTTTTACAGCAATATTATGAATTTTTTCAAGACCGAGATTACACTGG  
CCAATGGAGAGATTGGAAGCGACCACTTATCGAAAACAAACGGAGAAAACAGGAGAAAATCGTGTGGGACAAGGGTAGG  
GATTTTCGCGACAGTCCGGAAGGTCTGTCCATGCCGCGAGGTGAACATCGTTAAAAAGACCGAAGTACAGACCGGAGG  
TTTCTCAAAGGAAAGTATCgctCCGAAAAGGAACAGCGACAAGCTGATCGCACGCAAAAAAGATTGGGACCCCAAGA  
AATACGGCGGATTCgtgTCTCTACAGTCGCTTACAGTGTACTGGTTGTGGCCAAAGTGGAGAAAGGGAAGTCTAAA

AAACTCAAAGCGTCAAGGAAGTCTGGGCATCACAATCATGGAGCGATCAAGCTTCGAAAAAACCCCATCGACTT  
TCTGGAGGCGAAAGGATATAAAGAGGTCAAAAAAGACCTCATCATTAAAGCTTCCCAAGTACTCTCTCTTTGAGCTTG  
AAAACGGCCGAAACGAATGCTCGCTAGTGCcggttttCTGCAGAAAGGTAACGAGCTGGCACTGCCCTCTAAATAC  
GTTAATTTCTTGTATCTGGCCAGCCACTATGAAAAGCTCAAAGGGTCTCCCGAAGATAATGAGCAGAAGCAGCTGTT  
CGTGGAAACAACACAAACACTACCTTGATGAGATCATCGAGCAAATAAGCGAATTCTCCAAAAGAGTGATCCTCGCCG  
ACGCTAACCTCGATAAGGTGCTTTCTGCTTACAATAAGCACAGGGATAAGCCCATCAGGGAGCAGGCAGAAAAATT  
ATCCACTTGTCTACTCTGACCAACTTGGGCGCGCCTcgGCCTTCAAGTACTTCGACACTACCATAGACAGAAAGgt  
gtTACcgCTCTACAAAGGAGGTCTGGACGCCACACTGATTCATCAGTCAATTACGGGGCTCTATGAAACAAGAATCG  
ACCTCTCTCAGCTCGGTGGAGACTTAA

>dxCas9-NG

**ATG**GACAAGAAGTACTCCATTGGGCTCgctATCGGCACAAACAGCGTGGCTGGGCCGTCATTACGGACGAGTACAA  
GGTGGCCGAGCAAAAAATTCAAAGTTCTGGGCAATACCGATCGCCACAGCATAAAGAAGAACCTCATTGGCGCCCTCC  
TGTTTCGACTCCGGGGAGACGGCCGAAGCCACGCGGCTCAAAAAGAACAGCACGGCGCAGATATACCCGCAGAAAGAAT  
CGGATCTGTACTACCTGCAGGAGATCTTTAGTAATGAGATGGCTAAGGTGGATGACTCTTTCTTCCATAGGCTGGAGGA  
GTCTTTTTTGGTGGAGGAGGATAAAAAGCACAGCGCCACCCAAATCTTTGGCAATATCGTGGACGAGGTGGCGTACC  
ATGAAAAGTACCCAACCATATATCATCTGAGGAAGAAGCTTGAGACAGTACTGATAAGGCTGACTTGCGGTTGATC  
TATCTCGCGCTGGCGCATATGATCAAATTTGGGGACACTTCTCATCGAGGGGGACCTGAACCCAGACAACAGCGA  
TGTCGACAAACTCTTTATCCAACCTGGTTCAGACTTACAATCAGCTTTTTCGAAGAGAACCCGATCAACGCATCCGGAG  
TTGACGCCAAAGCAATCCTGAGCGCTAGGCTGTCCAAATCCCGGCGGCTCGAAAACCTCATCGCACAGCTCCCTGGG  
GAGAAGAAGAACGGCCTGTTTGGTAATCTTATCGCCCTGTCCCTCGGGCTGACCCCCAACTTTAAATCTAACTTCGA  
CCTGGCCGAAGATaccAAGCTTCAACTGAGCAAAGACACCTACGATGATGATCTCGACAATCTGCTGGCCAGATCG  
GCGACCAGTACGCAGACCTTTTTTTGGCGGCAAGAACCTGTGAGACGCCATTCTGCTGAGTGATATTCTGCGAGTG  
AACACGGAGATCACCAAAGCTCCGCTGAGCGCTAGTATGATCAAGctcTATGATGAGCACCACCAAGACTTGACTTT  
GCTGAAGGCCCTTGTGAGACAGCAACTGCCTGAGAAGTACAAGGAAATTTCTTCGATCAGTCTAAAAATGGCTACG  
CCGGATACATTGACGGCGGAGCAAGCCAGGAGGAATTTTACAATTTATTAAGCCCATCTTGAAAAAATGGACGGC  
ACCGAGGAGCTGCTGGTAAAGCTTAACAGAGAAGATCTGTTGCGCAAACAGCGCACTTTGACAATGGAatcATCCC  
CCACCAGATTCACCTGGGCGAAGTGCACGCTATCCTCAGGCGGCAAGAGGATTTCTACCCCTTTTTGAAAGATAACA  
GGGAAAAGATTGAGAAAATCCTCACATTTCCGATACCCCTACTATGTAGGCCCCCTCGCCCCGGGAAATTCAGATTC  
GCGTGGATGACTCGAAATCAGAAGAGACCATCACTCCCTGGAACCTCGAGaaaGTCTGGATAAGGGGGCCTCTGC  
CCAGTCTTTCATCGAAAGGATGACTAACTTTGATAAAAAATCTGCCTAACGAAAAGGTGCTTCTTAAACTCTCTGC  
TGTACGAGTACTTCACAGTTTATAACGAGCTCACCAAGGTCAAATACGTACAGAAAGGGATGAGAAAGCCAGCATT  
CTGTCTGGgatCAGAAGAAAGCTATTGTGGACCTCTCTTCAAAGACGAACCGGAAAGTTACCGTGAACAGCTCAA  
AGAAGACTATTTCAAAAAGATTGAATGTTTCGACTCTGTTGAAATCAGCGGAGTGGAGGATCGCTTCAACGCATCCC  
TGGGAACGTATCACGATCTCCTGAAAATCATTAAAGACAAGGACTTCTGGACAATGAGGAGAACGAGGACTTCTT  
GAGGACATTGTCCTCACCTTACGTTGTTTGAAGATAGGGAGATGATTGAAGAACGCTTGAAAACCTACGCTCATCT  
CTTCGACGACAAAGTCATGAAGCAGCTCAAGAGGCGCCGATATACAGGATGGGGGCGGCTGTCAAGAAAATGATCA  
ATGGGATCCGAGACAAGCAGAGTGGAAAGACAATCCTGGATTTTCTTAAGTCCGATGGATTTGCCAACCGGAATTC  
attCAGTTGATCCATGATGACTCTCTCACCTTTAAGGAGGACATCCAGAAAGCACAAGTTTCTGGCCAGGGGGACAG  
TCTTACAGAGCACATCGCTAATCTTGCAGGTAGCCCAGCTATCAAAAAGGGAATACTGCAGACCGTTAAGGTCTGTTG  
ATGAACTCGTCAAAGTAATGGGAAGGCATAAGCCCGAGAATATCGTTATCGAGATGGCCCCGAGAGAACCAAACCACC  
CAGAAGGGACAGAAGAACAGTAGGGAAAGGATGAAGAGGATTGAAGAGGTATAAAAAGAACTGGGGTCCCAAATCCT  
TAAGGAACACCCAGTTGAAAACACCCAGCTTCAAGATGAGAAGCTCTACCTGTACTACCTGCAGAACGGCAGGGACA  
TGTACGTGGATCAGGAAGTGGACATCAATCGGCTCTCCGACTACGACGTGGACgctATCGTGCCCCAGTCTTTTTCTC  
AAAGATGATTCTATTGATAATAAAGTGTGACAAGATCCGATAAAAACAGAGGGAAGAGTGATAACGTCCCTCAGA  
AGAAGTTGTCAAGAAAATGAAAATATTGGCGGCAGCTGCTGAACGCCAAACTGATCACACAACCGGAAGTTCGATA  
ATCTGACTAAGGCTGAACGAGGTGGCCTGTCTGAGTTGGATAAAGCCGGTTTTCATCAAAAAGGCAGCTTGTGAGACA  
CGCCAGATCACCAAGCACGTGGCCCAAATTTCTCGATTACGCATGAACACCAAGTACGATGAAAATGACAACTGAT  
TCGAGAGGTGAAAGTTATTACTCTGAAGTCTAAGCTGGTCTCAGATTTAGAAAAGGACTTTTCAAGTTTATAAGGTGA  
GAGAGATCAACAATTACCACCATGCGCATGATGCCTACCTGAATGCAGTGGTAGGCACTGCCTTATCAAAAAATAT  
CCCAAGCTGAATCTGAATTTGTTTACGGAGACTATAAAGGTACGATGTTAGGAAAATGATCGCAAAAGTCTGAGCA  
GGAATAGGCAAGGCCACCGCTAAGTACTTTTTACAGCAATATTATGAATTTTTTCAAGACCGAGATTACACTGG  
CCAATGGAGAGATTCGGAAGCGCACTTATCGAAAACAACCGGAAACAGGAGAAATCGTGTGGGACAAGGGTGG  
GATTTTCGACAGTCCGGAAGGTCTGTCCATGCCGAGGTGAACATCGTTAAAAAGACCGAAGTACAGACCGGAGG  
TTTCTCCAAGGAAAGTATCcgTCCGAAAAGGAACAGCGACAAGCTGATCGCACGCAAAAAGATTGGGACCCCAAGA  
AATACGGCGGATTCgtgTCTCTACAGTCTTACAGTGTACTGGTTGTGGCCAAAGTGGAGAAAGGGAAGTCTAAA

AAACTCAAAGCGTCAAGGAAGTCTGGGCATCACAATCATGGAGCGATCAAGCTTCGAAAAAACCCCATCGACTT  
TCTGGAGGCGAAAGGATATAAAGAGGTCAAAAAAGACCTCATCATTAAAGCTTCCCAAGTACTCTCTCTTTGAGCTTG  
AAAACGGCCGAAACGAATGCTCGCTAGTGCcggttttCTGCAGAAAGGTAACGAGCTGGCACTGCCCTCTAAATAC  
GTTAATTTCTTGTATCTGGCCAGCCACTATGAAAAGCTCAAAGGGTCTCCCGAAGATAATGAGCAGAAGCAGCTGTT  
CGTGGAAACAACACAAACACTACCTTGATGAGATCATCGAGCAAATAAGCGAATTCTCCAAAAGAGTGATCCTCGCCG  
ACGCTAACCTCGATAAGGTGCTTTCTGCTTACAATAAGCACAGGGATAAGCCCATCAGGGAGCAGGCAGAAAAATT  
ATCCACTTGTCTTACTCTGACCAACTTGGGCGCGCCTcgTGCCTTCAAGTACTTCGACACTACCATAGACAGAAAGgt  
gtTACcgCTACAAAGGAGGTCTGGACGCCACACTGATTCATCAGTCAATTACGGGGCTCTATGAAACAAGAATCG  
ACCTCTCTCAGCTCGGTGGAGACTTAA

>dSpG

ATGGATAAGAAATACTCAATAGGCTTagctATCGGCACAAATAGCGTCCGGATGGGCGGTGATCACTGATGAATATAA  
GGTTCGGTCTAAAAAGTTCAAGGTTCTGGGAAATACAGACCGCCACAGTATCAAAAAAATCTTATAGGGGCTCTTT  
TATTTGACAGTGGAGAGACAGCGGAAGCGACTCGTCTCAAACGGACAGCTCGTAGAAGGTATACACGTCGGAAGAAT  
CGTATTTGTTATCTACAGGAGATTTTTTCAAATGAGATGGCGAAAGTAGATGATAGTTTCTTTCATCGACTTGAAGA  
GTCTTTTTTGGTGGAAAGAACAAGAAGCATGAACGTCATCTATTTTTGGAAATATAGTAGATGAAGTTGCTTATC  
ATGAGAAATATCCAACATCTATCATCTGCGAAAAAATTTGGTAGATTCTACTGATAAAGCGGATTTGCGCTTAATC  
TATTTGGCCTTAGCGCATATGATTAAGTTTCGTGGTCATTTTTGATTGAGGGAGATTTAAATCCTGATAATAGTGA  
TGTGGACAAACTATTTATCCAGTTGGTACAAACCTACAATCAATTATTTGAAGAAAACCCTATTAACGCAAGTGGAG  
TAGATGCTAAAGCGATTTCTTCTGCACGATTGAGTAAATCAAGACGATTAGAAAATCTCATTGCTCAGCTCCCCGGT  
GAGAAGAAAAATGGCTTATTTGGGAATCTCATTGCTTTGTCTTTGGGTTTGACCCTAATTTAAATCAAATTTTGA  
TTTTGGCAGAAGATGCTAAATACAGCTTTCAAAGATACTTACGATGATGATTTAGATAATTTTATTGGCGCAAATG  
GAGATCAATATGCTGATTTGTTTTGGCAGCTAAGAATTTATCAGATGCTATTTTACTTTTACAGATATCCTAAGAGTA  
AATACTGAAATAACTAAGGCTCCCCTATCAGCTTCAATGATTAACGCTACGATGAACATCATCAAGACTTGACTCT  
TTTTAAAGCTTTAGTTTCGACAACAACCTCCAGAAAAGTATAAAAGAAATCTTTTTTGGATCAATCAAAAAACGGATATG  
CAGGTTATATTGATGGGGGAGCTAGCCAAGAAGAATTTTATAAATTTATCAAACCAATTTTAGAAAAAATGGATGGT  
ACTGAGGAATTTTGGTGAACATAAATCGTGAAGATTTGCTGCGCAAGCAACGGACCTTTGACAACGGCTCTATTCC  
CCATCAAATTCACTTGGGTGAGCTGCATGCTATTTTGAAGAACAAGAAGACTTTTATCCATTTTAAAGACAATC  
GTGAGAAGATTGAAAAATCTTGACTTTTCGAATTCCTTATTATGTTGGTCCATTGGCGCGTGGCAATAGTCGTTTT  
GCATGGATGACTCGGAAGTCTGAAGAAACAATTACCCCATGGAATTTTGAAGAAGTTGTCGATAAAGGTGCTTCAGC  
TCAATCATTTATTGAACGCATGACAAACTTTGATAAAAAATCTTCAAATGAAAAAGTACTACCAAAACATAGTTTGC  
TTTTATGAGTATTTTACGGTTTATAACGAATTGACAAAGGTCAAATATGTTACTGAAGGAATGCGAAAACAGCATT  
CTTTTACGGTGAACAGAAGAAAGCCATTGTTGATTTACTCTTCAAACCAAATCGAAAAGTAACCGTTAAGCAATTA  
AGAAGATTATTTCAAAAAAATAGAATGTTTTGATAGTGTGAAATTTTCAAGGAGTTGAAGATAGATTTAATGCTTCAT  
TAGGTACCTACCATGATTTGCTAAAAATTTAAAGATAAAGATTTTTTGGATAATGAAGAAAATGAAGATATCTTA  
GAGGATATTGTTTTAACATTGACCTTATTTGAAGATAGGGAGATGATTGAGGAAAGACTTAAACATATGCTCACCT  
CTTTGATGATAAGGTGATGAAACAGCTTAAACGTCGCCGTTTACTGGTTGGGGACGTTTGTCTCGAAAATTGATTA  
ATGGTATTAGGATAAGCAATCTGGCAAAACAATATTAGATTTTTGAAATCAGATGGTTTTGCCAATCGCAATTTT  
TTGACGTCATCCATGATGATGTTGACATTTAAAGAAAGACATTTCAAAGCACAAGTGTCTGGACAAGGCGATAG  
TTTTACATGAACATATTGCAAATTTAGCTGGTAGCCCTGCTATTAATAAAGGATTTTTTACAGACTGTAAAAGTTGTTG  
ATGAATTTGGTCAAAGTAATGGGGCGGCATAAGCCAGAAAATATCGTTATTGAAATGGCACGTGAAAATCAGACAAC  
CAAAGGGCCAGAAAATTCGCGAGAGCGTATGAAACGAATCGAAGAAGGTATCAAAGAATTAGGAAGTCAGATTCT  
TAAAGAGCATCTGTTGAAAATACTCAATTGCAAAATGAAAAGCTCTATCTCTATTATCTCCAAAATGGAAGAGACA  
TGTATGTGGACCAAGAATTAGATATTAATCGTTTAAAGTATTGATGTCGATgCGATTGTTCCACAAAGTTTCCTT  
AAAGACGATTCAATAGACAATAAGGTCTTAAACGCTTCTGATAAAAAATCGTGGTAAATCGGATAACGTTCCAAGTGA  
AGAAGTAGTCAAAAAGATGAAAAACTATTGGAGACAACCTCTAAACGCCAAGTTAATCACTCAACGTAAGTTTGATA  
ATTTAACGAAAGCTGAACGTGGAGTTTGGAGTGAACCTGATAAAGCTGGTTTTATCAAACGCCAATTGGTTGAACT  
CGCCAAATCACTAAGCATGTGGCACAATTTTTGGATAGTCGCATGAATACTAAATACGATGAAAATGATAAATTTAT  
TCGAGAGGTTAAAGTGATTACCTTAAATCTAAATTAGTTTCTGACTTCCGAAAAGATTTCCAATTTCTATAAAGTAC  
GTGAGATTAACAATTACCATCATGCCATGATGCGTATCTAAATGCCGTCGTTGGAAGTCTTTGATTAAGAAATAT  
CCAAAACCTTGAATCGGAGTTTGTCTATGGTGATTATAAAGTTTATGATGTTTCGTAATAATGATTGCTAAGTCTGAGCA  
AGAAATAGGCAAAGCAACCGCAAAATATTTCTTTTACTCTAATATCATGAACTTCTTCAAACAGAAAATTACTTGTG  
CAAATGGAGAGATTTCGCAAACGCCCTCTAATCGAAACTAATGGGGAAACTGGAGAAAATGTTCTGGGATAAAGGGCGA  
GATTTTGGCACAGTGCGCAAAGTATTGTCCATGCCCAAGTCAATATTGTCAAGAAAACAGAAGTACAGACAGGCGG  
ATTCTCAAAGGAGTCAATTTTACCAAAAAGAAATTCGGACAAGCTTATTGCTCGTAAAAAAGACTGGGATCCAAAA  
AATATGGTGGTTTTctgtggCCAACGGTAGCTTATTCAGTCTTAGTGGTTGCTAAGGTGAAAAAGGAAATCGAAG

AAGTTAAAATCCGTTAAAGAGTTACTAGGGATCACAATTATGGAAAGAAGTTCCTTTGAAAAAATCCGATTGACTT  
TTTGAAGCTAAAGGATATAAGGAAGTTAAAAAGACTTAATCATTAACTACCTAAATATAGTCTTTTTGAGTTAG  
AAAACGGTCGTAAACGGATGCTGGCTAGTGCCaaacagTTACAAAAGGAAATGAGCTGGCTCTGCCAAGCAAATAT  
GTGAATTTTTTATATTTAGCTAGTCATTATGAAAAGTTGAAGGGTAGTCCAGAAGATAACGAACAAAAACAATTGTT  
TGTGGAGCAGCATAAGCATTATTTAGATGAGATTATTGAGCAAATCAGTGAATTTTCTAAGCGTGTTATTTTTAGCAG  
ATGCCAATTTAGATAAAGTTCTTAGTGCATATAACAAACATAGAGACAAACCAATACGTGAACAAGCAGAAAAATATT  
ATTCATTTATTTACGTTGACGAATCTTGGAGCTCCCGCTGCTTTTAAATATTTTGATACAACAATTGATCGTAAca  
gTATcgtTCTACAAAAGAAGTTTATAGTCCACTCTTATCCATCAATCCATCACTGGTCTTTATGAAACACGCATTG  
ATTTGAGTCAGCTAGGAGGTGACTAA

>dSpRY

ATGGATAAGAAATACTCAATAGGCTTagctATCGGCACAAATAGCGTCGGATGGGCGGTGATCACTGATGAATATAA  
GGTTCGGTCTAAAAAGTTCAAGGTTCTGGGAAATACAGACCGCCACAGTATCAAAAAAATCTTATAGGGGCTCTTT  
TATTTGACAGTGGAGAGACAGCGGAAcgtACTCGTCTCAAACGGACAGCTCGTAGAAGGTATACACGTCGGAAGAAT  
CGTATTTGTTATCTACAGGAGATTTTTTCAAATGAGATGGCGAAAGTAGATGATAGTTTCTTTCATCGACTTGAAGA  
GTCTTTTTTGGTGGAAAGACAAGAAGCATGAACGTCATCTATTTTTGGAAATATAGTAGATGAAGTTGCTTATC  
ATGAGAAATATCCAACATCTATCATCTGCGAAAAAATTTGGTAGATTCTACTGATAAAGCGGATTTGCGCTTAATC  
TATTTGGCCTTAGCGCATATGATTAAGTTTCGTGGTCATTTTTGATTGAGGGAGATTTAAATCCTGATAATAGTGA  
TGTGGACAAACTATTTATCCAGTTGGTACAAACCTACAATCAATTATTTGAAGAAAACCCTATTAACGCAAGTGGAG  
TAGATGCTAAAAGCGATTCTTTCTGCACGATTGAGTAAATCAAGACGATTAGAAAATCTCATTGCTCAGCTCCCCGGT  
GAGAAGAAAAATGGCTTATTTGGGAATCTCATTGCTTTGTCAATGGGTTTGACCCTAATTTTAAATCAAATTTTGA  
TTTGGCAGAAGATGCTAAATACAGCTTTCAAAGATACTTACGATGATGATTTAGATAAATTTATTGGCGCAAATTTG  
GAGATCAATATGCTGATTTGTTTTGGCAGCTAAGAATTTATCAGATGCTATTTACTTTTACAGATATCCTAAGAGTA  
AATACTGAAATAACTAAGGCTCCCCTATCAGCTTCAATGATTAACGCTACGATGAACATCATCAAGACTTGACTCT  
TTTTAAAGCTTTAGTTCGACAACAACCTCCAGAAAAGTATAAAAGAAATCTTTTTTATGATCAATCAAAAAACGGATATG  
CAGGTTATATTGATGGGGGAGCTAGCCAAGAAGAATTTATAAATTTATCAAACCAATTTTAGAAAAAATGGATGGT  
ACTGAGGAATTTATTGGTGAACATAAATCGTGAAGATTTGCTGCGCAAGCAACGGACCTTTGACAACGGCTCTATTCC  
CCATCAAATTCACTTGGGTGAGCTGCATGCTATTTTGAAGAAGACAAGAAGACTTTTATCCATTTTAAAAGACAATC  
GTGAGAAGATTGAAAAAATCTTGACTTTTCGAATTCCTTATTATGTTGGTCCATTGGCGCGTGGCAATAGTCGTTTT  
GCATGGATGACTCGGAAGTCTGAAGAAACAATTACCCCATGGAATTTTGAAGAAGTTGTCGATAAAGGTGCTTCAGC  
TCAATCATTTATTGAACGCATGACAAACTTTGATAAAAAATCTTCAAATGAAAAAGTACTACCAAAACATAGTTTGC  
TTTTATGAGTATTTTACGGTTTATAACGAATTGACAAAGGTCAAATATGTTACTGAAGGAATGCGAAAACAGCATT  
CTTTTACGGTGAACAGAAGAAAGCCATTGTTGATTTACTCTTCAAACCAAATCGAAAAGTAACCGTTAAGCAATTA  
AGAAGATTATTTCAAAAAAATAGAATGTTTTGATAGTGTGAAATTTTCAAGGAGTTGAAGATAGATTTAATGCTTCAT  
TAGGTACCTACCATGATTTGCTAAAAATTTAAAGATAAAGATTTTTTGGATAATGAAGAAAATGAAGATATCTTA  
GAGGATATTGTTTTAACATTGACCTTATTTGAAGATAGGGAGATGATTGAGGAAAGACTTAAACATATGCTCACCT  
CTTTGATGATAAGGTGATGAAACAGCTTAAACGTCGCCGTTATACTGGTTGGGGACGTTTGTCTCGAAAATTGATTA  
ATGGTATTAGGGATAAGCAATCTGGCAAAACAATATTAGATTTTTGAAATCAGATGGTTTTGCCAATCGCAATTTT  
TTACAGTGAACATATTGCAAATTTAGCTGGTAGCCCTGCTATTA AAAAAGGTATTTTACAGACTGTAAAAGTTGTTG  
ATGAATTGGTCAAAGTAATGGGGCGGCATAAGCCAGAAAATATCGTTATTGAAATGGCACGTGAAAATCAGACAAC  
CAAAAGGGCCAGAAAATTCGCGAGAGCGTATGAAACGAATCGAAGAAGGTATCAAAGAATTAGGAAGTCAGATTCT  
TAAAGAGCATCTGTTGAAAATACTCAATTGCAAAATGAAAAGCTCTATCTCTATTATCTCCAAAATGGAAGAGACA  
TGTATGTGGACCAAGAATTAGATATTAATCGTTTAAAGTATTATGATGTGATgcgATTGTTCCACAAAGTTTCCTT  
AAAGACGATTCAATAGACAATAAGGTCTTAAACGCTTCTGATAAAAAATCGTGGTAAATCGGATAACGTTCCAAGTGA  
AGAAGTAGTCAAAAAGATGAAAAACTATTGGAGACAACCTCTAAACGCCAAGTTAATCACTCAACGTAAGTTTGATA  
ATTTAACGAAAGCTGAACGTGGAGGTTTGAAGTGAACCTGATAAAGCTGGTTTTATCAAACGCCAATTGGTTGAACT  
CGCCAAATCACTAAGCATGTGGCACAATTTTTGGATAGTCGCATGAATACTAAATACGATGAAAATGATAAATTTAT  
TCGAGAGGTTAAAGTGATTACCTTAAATCTAAATTAGTTTCTGACTTCCGAAAAGATTTCCAATTTCTATAAAGTAC  
GTGAGATTAACAATTACCATCATGCCATGATGCGTATCTAAATGCCGTCGTTGGAAGTCTTTGATTAAGAAATAT  
CCAAAACCTTGAATCGGAGTTTGTCTATGGTGATTATAAAGTTTATGATGTTTCGTA AAAATGATTGCTAAGTCTGAGCA  
AGAAATAGGCAAAGCAACCGCAAAATATTTCTTTTACTCTAATATCATGAACTTCTTCAAACAGAAAATTACTTGTG  
CAAATGGAGAGATTGCAAAACGCCCTCTAATCGAAACTAATGGGGAAACTGGAGAAAATTTGCTGGGATAAAGGGCGA  
GATTTTGGCACAGTGCGCAAAAGTATTGTCCATGCCCAAGTCAATATTGTCAAGAAAACAGAAGTACAGACAGGCGG  
ATTCTCCAAGGAGTCAATcgtCCAAAAGAAATTCGGACAAGCTTATTGCTCGTAAAAAAGACTGGGATCCAAAA  
AATATGGTGGTTTTctgtggCCAACGGTAGCTTATTCAGTCTTAGTGGTTGCTAAGGTGAAAAAGGAAATCGAAG

AAGTTAAAATCCGTTAAAGAGTTACTAGGGATCACAATTATGGAAAGAAGTTCCTTTGAAAAAATCCGATTGACTT  
TTTAGAAGCTAAAGGATATAAGGAAGTTAAAAAGACTTAATCATTAAACTACCTAAATATAGTCTTTTTGAGTTAG  
AAAACGGTCGTAAACGGATGCTGGCTAGTGCCaaacagTTACAAAAAGGAAATGAGCTGGCTCTGCCAAGCAAATAT  
GTGAATTTTTTATATTTAGCTAGTCATTATGAAAAGTTGAAGGGTAGTCCAGAAGATAACGAACAAAAACAATTGTT  
TGTGGAGCAGCATAAGCATTATTTAGATGAGATTATTGAGCAAATCAGTGAATTTTCTAAGCGTGTTATTTTAGCAG  
ATGCCAATTTAGATAAAGTTCTTAGTGCATATAACAAACATAGAGACAAACCAATACGTGAACAAGCAGAAAATATT  
ATTCATTTATTTACGTTGACGcgtCTTGAGCTCCCcgtGCCTTTTAAATATTTTGATACAACAATTGATccgAAACA  
gTATcgtTCTACAAAAGAAGTTTATAGATGCCACTCTTATCCATCAATCCATCACTGGTCTTTATGAAACACGCATTG  
ATTTGAGTCAGCTAGGAGGTGACTTAA

### scRNA/sgRNA expression cassettes

>BBa\_J23119(SpeI)-scRNA.1xMS2.b2-TrnB

TTGACAGCTAGCTCAGTCCTAGGTATAATACTAGTNNNNNNNNNNNNNNNNNNNGTTTTAGAGCTAGAAATAGCAA  
GTTAAAATAAGGCTAGTCCGTTATCAACTTGAAAAAGTGGCACATGAGGATCACCCATGTGCTTTTTTTGAAGCTTG  
GGCCGAACAAAAACTCATCTCAGAAGAGGATCTGAATAGCGCCGTCGACCATCATCATCATCATTGAGTTTAA  
ACGGTCTCCAGCTTGGCTGTTTTGGCGGATGAGAGAAGATTTTCAGCCTGATACAGATTAAATCAGAACGCAGAAGC  
GGTCTGATAAAACAGAATTTGCCTGGCGGCAGTAGCGCGGTGGTCCCACCTGACCCCATGCCGAACCTCAGAAGTGAA  
ACGCCGTAGCGCCGATGGTAGTGTGGGTCTCCCCATGCGAGAGTAGGGAAGTCCAGGCATCAAATAAACGAAAG  
GCTCAGTCGAAAGACTGGGCCTTTCGTTTTATCTGTTGTTTGTGCGGTGAACT

>BBa\_J23119(SpeI)-sgRNA-BBa\_K2680405

TTGACAGCTAGCTCAGTCCTAGGTATAATACTAGTNNNNNNNNNNNNNNNNNNNGTTTTAGAGCTAGAAATAGCAA  
GTTAAAATAAGGCTAGTCCGTTATCAACTTGAAAAAGTGGCACCGAGTCCGGTGCTTTTTTTAACGCATGAGAAAGCC  
CCCGGAAGATCACCTTCCGGGGCTTTTTTATTGCGC

*E. coli* endogenous promoters (annotated by RegulonDB) as in pCK590 (+ strand) and pCK591 (- strand). Underlined sequences are 35bp minimal promoters. **Bolded** nucleotides are **TSS** according to RegulonDB (cite Santos-Zavaleta et al., 2019) or **start codon** of the GFPmut2.

>yajGp

GGATCCGAACGCCGCCCTTAATTTTTCTTCTATCCGCTCACGTATCATCATGAAATATCTCCTCCGACAACGCTGAG  
ATGTCATCCATCCCTTTAAATACTAGCCGCTTTTACCGTTTCCATTGCAGCTTAACAACAAATATTTAGGTTTCGTC  
CTGGTTTTTCCGTCAAGCGTATGAAGTTTACTGATTTAAAGATTGAAACACAGGCCTCGCATCAGTGTTCCTTTTAC  
CAGGGGCGATTATTTTCGTCAACATGATGAATTTACATGCCTTACCCACTTCCCCTCGCCGTTGGCAATGTTATGATG  
GCGGGAATTTTTACCACTCGAGAGATCCTCTAGATTTAAGAAGGAGATATACAT**ATG**

>uxuRp

CTCGAGACTTTGTTGGCGCAGTGACGGCGGCATATCAGCAGCTGTGCGAACGCGGTGCGCGCAGTGTGTGGCTGCG  
CTGTAACATACTGATTACCCTACAGACTTACTGGTCAATCAAACCTGATATTTGGTTGACCAGTTTTTCGTTTTTTTGC  
CCACCTGTACGTGCCAACTTCCAGT**G**CTAATGGTATAGTTTGAGATTAACGGGGCCGTAAAATTGCCCGTTGTAGG  
CCGGATAAGGCGTTCACGCCGCATCCGGCAAAAATTTGATTAACCGCACCTAACGGACACAACACCATGAAATCTGC  
CACCTCTGCGCAAAGACCTTACCAGGAAGTCGGGGCGATGATCCGCGATCTGATCATAAAGACGCCGTACAATCCTG  
GGGATCCTCTAGATTTAAGAAGGAGATATACAT**ATG**

>araEp

GGATCCCTGATGGGGCCGATAGTGTTCCTTGCCTCCAGCGCTTCCAGATTATGTGAATGGTTATACCATTGCCGTGGA  
TGGCGGTTGGCTGGCGCGTTAATTCATTCTTCTTACTTTTTATGACCCTGCCGCATGGCAGGGTTTTTTTATACCTGTA  
GATCATCATAATCCATATCATGGTTATGAAATAATCCATATTAATTATCAATTAATGAACTTTATGAATTTTTATCTG  
CTGTAATAATTAGGTGGTTAATAATAATCTCAATAATCAACTTAATTTGAAAATTGGAATATCCATCACATAACGAC  
ATGTCGCAGCAATTTAATCCATATTTATGCTGTTTCCGACCTGACACCTGCGTGAGTTGTTTACGTATTTTTTCACT  
AT**G**TCTTACTCTCTGCTGGCAGGAAAAAATGGTTACTATCAATACGGAATCTGCTTTAACGCCACGTTCTTTGCGGG  
ATACGCGGCGTATGAATATGTTTGTTCGGTAGCTGCTGCGCTCGAGAGATCCTCTAGATTTAAGAAGGAGATATAC  
AT**ATG**

>ppiDp2

CTCGAGCCGCAGACCGGTAAAGAGATCACCATCGCTGCTGCTAAAGTACCGAGCTTCCGTGCAGGTAAAGCACTGAA  
AGACGCGGTAAACTAAGCGTTGTCCCCAGTGGGGATGTGACGAAGTTCAAGGGCGCATCTACTGATGTGCCTTTTTT  
ATTTGTATTCGGTGACTTTCTGCGTCTTGTGGGCT**G**GACAATTGCCCCCGTTTTCTTGTACAAATAGGCCTTTGCGCGC  
ATCGATACGTTGCGTGAGGTACACAGTCATCTACAGCGGAGTGTTGTTACACCATGATGGACAGCTTACGCACGGCT  
GGATCCTCTAGATTTAAGAAGGAGATATACAT**ATG**

>aroKp1 (aroKp2 is not included)

GGATCCTCGGGCAATTATTTTCGTTCATGACGGAAAAGAAGATGAACGACGCGAGTTAGTGGTGTTTATCACGCCACGA  
CTGGTTTTCCAGTGAGTAAACAGCCGTAAAAGCGGTAATGTTTTTACGCTGAACGTGTTTCATCTATTTGACGCGCGC  
AGGTATTTAGCATAACAAGGAGTACC**G**ATTTGAGAGTTGGTGTCTTTCGCTGCCTGCGTTCCATGATGATGATTTATC  
ATTCAGGCGGCATTTTGTCTGCTTTTTTACGCTAATCTTACCCGGTGATTTATCGCCAGAGCGGTGGTAGCAAGGCA  
GCGCGCTTGCAGCGACCAGATATGCAGAGGGATGGGTGATTTATTTCAGTTGCCAAACCCGCTCGAGAGATCCTCTAG  
ATTTAAGAAGGAGATATACAT**ATG**

>aroLp

CTCGAGGGCGGACCAGATAGCCTTTCACAACGTGACCGCCAGGCCTTTGCCGCGGAGCTGGAGAAGTGGTGGCTGGA  
AGTGCAACGTAGTCGTGGCTAAATGTAATTTATTATTTACACTTTCATTCTTGAATATTTATTGGTATAGTAAGGGGT  
GT**A**TTGAGATTTTCACTTTAAGTGAATTTTTTCTTTACAATCGAAATTGTACTAGTTTGATGGTATGATCGCTATT

CTCATGACACCGGCTTTTCGCCGATTGCGACCTATTGGGGAAAACCCACGATGACACAACCTCTTTTTCTGATCGGG  
CCTCGGGGCTGTGGTAAAACAACGGTCGGAATGGCCCTTGCCGATTGCTTAACCGGATCCTCTAGATTTAAGAAGG  
AGATATACAT**ATG**

>aroFp

GGATCCCAACAAGGGGGCGATAAACTTTTTATCATTCTTTCTCCTTTTTCAAAGCATAGCGGATTGTTTTCAAAG  
GGAGTGTAATTTATCTATACAGAGGTAAGGGTTGAAAGCGCGACTAAATTGCCTGTGTAAATAAAAATGTACGAAA  
TATGGATTGAAAACCTTTACTTTATGTGTTATCGTTACGTC**AT**CCTCGCTGAGGATCAACTATCGCAAACGAGCATAA  
ACAGGATCGCCATCATGCAAAAAGACGCGCTGAATAACGTACATATTACCGACGAACAGGTTTTAATGACTCCGGAA  
CAACTGAAGGCCGCTTTTCCATTCTCGAGAGATCCTCTAGATTTAAGAAGGAGATATACAT**ATG**

>aroHp (aroHp1 and aroHp2 are available in this reporter)

CTCGAGTCAGATCCCGTGGATTAACAGTACCAATTATTCGGTAGAAGAGATTGCCACCAAGATCCTCGATATCATGG  
GCCTTAGTCGCCGAATGTACTAGAGAAGTAGTGCATTAGCTTATTTTTTTGTTATCATGCTA**ACC**ACCCGGCGAGGT  
GTGACACACCTCGCACTTGAAATCAGCAGCGATTGGTTTTATCGTGATGCGC**AT**CACTTCCCGGCAGTCCTGCCGTAG  
AAGCAACAAATTTCTGAGACTTGTAATGAACAGAAGTACGAACCTCCGTACTGCGCGTATTGAGAGCCTGGTAACGC  
CCGCCGAAGTACGGTATCCCGTAACGCCTGGGGATCCTCTAGATTTAAGAAGGAGATATACAT**ATG**

>pheLp

CTCGAGACAAAGGCGAAGCACGTCGTGCCGAACATCGGTGAAAGACGCCAACTTCGTGGAAGAAGTTGAAGAAGAG  
TAGTCCTTTTATATTGAGTGTATCGCCAACGCGCCTTCGGGCGCGTTTTTTTTGTTGACAGCGTGAAAACAGTACGGGTA  
CTGTACTAA**AGT**CACTTAAGGAAACAAACATGAAACACATACCGTTTTTCTTCGCATTCTTTTTTACCTTCCCCTGA  
ATGGGAGGATCCTCTAGATTTAAGAAGGAGATATACAT**ATG**

>secBp

GGATCCGATGGCAACGCCGCAAGCGTGAAGAGATGATCAAACGCAGCGGTGCGACCACGGTTCCCCAGATTTTTTAT  
TGACGCACAGCACATTGGCGGCTGTGATGACTTTGATGCAATTGGATGCACGTGGTGGACTGGATCC**C**CTGCTGAAAT  
AACGTGTGAACGTTGGCATTACATTGCGCAGTATTTAAGGACAACACTTAAGGGTTTTCTACACATGTCAGAACAAA  
ACAACACTGAAATGACTTTCCAGATCCAACGTATTTATACCAAGGATATCTCTTTCGAAGCGCCGCTCGAGAGATCC  
TCTAGATTTAAGAAGGAGATATACAT**ATG**

>serCp

CTCGAGTCATATGAAAGCGGGGGAAAAACAATTATGTCCGCGCTGTGCAAATCCAGAATGGACGAAGGCAAGTCCGG  
CAAAACGGGTGACCTGACAGTAAAAACATCGGCTTTTTGCTAATAATCCGAGAGATTCTTTTGTGTGATGCAAGCCA  
CATTTTTGCCCTCAACGGTTTTACTCATTGCGATGTGTGTCAC**TGAATGATAAAA**CCGATAGCCACAGGAATAATGT  
ATT**AC**CTGTGGTCGCAATCGATTGACCGCGGGTTAATAGCAACGCAACGTGGTGGGGGAAATGGCTCAAATCTTCA  
ATTTTAGTTCTGGTCCGGCAATGCTACCGGCAGAGGTGCTTAAACAGGCTCAACAGGAAGTGCAGGACTGGAACGGT  
CTTGGGGATCCTCTAGATTTAAGAAGGAGATATACAT**ATG**

>talAp

CTCGAGGGGATCCAATATAGCCTCTGGCAACGCAGCCTCGAGGCTGTGTTGCCAGAGGCTTGGTTGGAGAAACCTGG  
ATTTTCCCTGGAAGTGGAAATTCATGGAAATCAAGTGCCTTTGTTTTAACTGGTCATCCATTTGGTTGTTCTTTT  
ACGTAACGTTCAAAATAAAGTGTGTGGCAACAGCCCCTGCCACAACGTGGCGCACATTATTACCCTGCCGGAGT  
CTACAGACTTTGAGCAAGTCCAAACTCTCACCATTAATAATAATGTTTTGGTAATAATCCTATAAACTGATGTTACC  
TGCTTAATCCAGCAATACCATGCCTGTCTGCTATGCTTTTTTGGTATGCGTTTTAGCGAAATTT**C**TCAGAAGTGTGAATT  
AACGCACTCATTAACACTTTACTTTTCAAGGAGTATTTCCCTATGAACGAGTTAGACGGCATCAAACAGTTCCACCAC  
TGTCGTGGCAGACAGCGGCGATATTGGATCCTCTAGATTTAAGAAGGAGATATACAT**ATG**



## References

- (1) Qi, L. S.; Larson, M. H.; Gilbert, L. A.; Doudna, J. A.; Weissman, J. S.; Arkin, A. P.; Lim, W. A. Repurposing CRISPR as an RNA-Guided Platform for Sequence-Specific Control of Gene Expression. *Cell* **2013**, *152* (5), 1173–1183. <https://doi.org/10.1016/j.cell.2013.02.022>.
- (2) Hu, J. H.; Miller, S. M.; Geurts, M. H.; Tang, W.; Chen, L.; Sun, N.; Zeina, C. M.; Gao, X.; Rees, H. A.; Lin, Z.; Liu, D. R. Evolved Cas9 Variants with Broad PAM Compatibility and High DNA Specificity. *Nature* **2018**, *556* (7699), 57–63. <https://doi.org/10.1038/nature26155>.
- (3) Nishimasu, H.; Shi, X.; Ishiguro, S.; Gao, L.; Hirano, S.; Okazaki, S.; Noda, T.; Abudayyeh, O. O.; Gootenberg, J. S.; Mori, H.; Oura, S.; Holmes, B.; Tanaka, M.; Seki, M.; Hirano, H.; Aburatani, H.; Ishitani, R.; Ikawa, M.; Yachie, N.; Zhang, F.; Nureki, O. Engineered CRISPR-Cas9 Nuclease with Expanded Targeting Space. *Science* **2018**, *361* (6408), 1259–1262. <https://doi.org/10.1126/science.aas9129>.
- (4) Legut, M.; Daniloski, Z.; Xue, X.; McKenzie, D.; Guo, X.; Wessels, H.-H.; Sanjana, N. E. High-Throughput Screens of PAM-Flexible Cas9 Variants for Gene Knockout and Transcriptional Modulation. *Cell Rep.* **2020**, *30* (9), 2859–2868.e5. <https://doi.org/10.1016/j.celrep.2020.02.010>.
- (5) Walton, R. T.; Hsu, J. Y.; Joung, J. K.; Kleinstiver, B. P. Scalable Characterization of the PAM Requirements of CRISPR–Cas Enzymes Using HT-PAMDA. *Nat. Protoc.* **2021**, *16* (3), 1511–1547. <https://doi.org/10.1038/s41596-020-00465-2>.
- (6) Walton, R. T.; Christie, K. A.; Whittaker, M. N.; Kleinstiver, B. P. Unconstrained Genome Targeting with Near-PAMless Engineered CRISPR-Cas9 Variants. *Science* **2020**, eaba8853. <https://doi.org/10.1126/science.aba8853>.
- (7) Kleinstiver, B. P.; Pattanayak, V.; Prew, M. S.; Tsai, S. Q.; Nguyen, N. T.; Zheng, Z.; Joung, J. K. High-Fidelity CRISPR–Cas9 Nucleases with No Detectable Genome-Wide off-Target Effects. *Nature* **2016**, *529* (7587), 490–495. <https://doi.org/10.1038/nature16526>.
- (8) Kleinstiver, B. P.; Prew, M. S.; Tsai, S. Q.; Topkar, V. V.; Nguyen, N. T.; Zheng, Z.; Gonzales, A. P. W.; Li, Z.; Peterson, R. T.; Yeh, J.-R. J.; Aryee, M. J.; Joung, J. K. Engineered CRISPR-Cas9 Nucleases with Altered PAM Specificities. *Nature* **2015**, *523* (7561), 481–485. <https://doi.org/10.1038/nature14592>.
- (9) Klanschnig, M.; Cserjan-Puschmann, M.; Striedner, G.; Grabherr, R. CRISPRactivation-SMS, a Message for PAM Sequence Independent Gene up-Regulation in Escherichia Coli. *Nucleic Acids Res.* **2022**, gkac804. <https://doi.org/10.1093/nar/gkac804>.
- (10) Fontana, J.; Dong, C.; Kiattisewee, C.; Chavali, V. P.; Tickman, B. I.; Carothers, J. M.; Zalatan, J. G. Effective CRISPRa-Mediated Control of Gene Expression in Bacteria Must Overcome Strict Target Site Requirements. *Nat. Commun.* **2020**, *11* (1), 1618. <https://doi.org/10.1038/s41467-020-15454-y>.
- (11) Fontana, J.; Dong, C.; Ham, J. Y.; Zalatan, J. G.; Carothers, J. M. Regulated Expression of SgRNAs Tunes CRISPRi in E. Coli. *Biotechnol J* **2018**, *13* (9), e1800069. <https://doi.org/10.1002/biot.201800069>.
- (12) Tickman, B. I.; Burbano, D. A.; Chavali, V. P.; Kiattisewee, C.; Fontana, J.; Khakimzhan, A.; Noireaux, V.; Zalatan, J. G.; Carothers, J. M. Multi-Layer CRISPRa/i Circuits for Dynamic Genetic Programs in Cell-Free and Bacterial Systems. *Cell Syst.* **2021**, S2405471221004191. <https://doi.org/10.1016/j.cels.2021.10.008>.
- (13) Zaslaver, A.; Bren, A.; Ronen, M.; Itzkovitz, S.; Kikoin, I.; Shavit, S.; Liebermeister, W.; Surette, M. G.; Alon, U. A Comprehensive Library of Fluorescent Transcriptional Reporters for Escherichia Coli. *Nat. Methods* **2006**, *3* (8), 623–628. <https://doi.org/10.1038/nmeth895>.
- (14) Kim, N.; Kim, H. K.; Lee, S.; Seo, J. H.; Choi, J. W.; Park, J.; Min, S.; Yoon, S.; Cho, S.-R.; Kim, H. H. Prediction of the Sequence-Specific Cleavage Activity of Cas9 Variants. *Nat.*

*Biotechnol.* **2020**. <https://doi.org/10.1038/s41587-020-0537-9>.
